# Supplementary material for: Probing the mechanism of the conversion of methyl levulinate into γ-valerolactone catalyzed by Al(OiPr)3 in an alcohol solvent: a DFT study
Source: Royal Society of Chemistry journal article supplement (doi:10.1039/d1ra08429a), 2022-01-01
Supplement: d1ra08429a1.pdf [file d1ra08429a1.pdf]

## Supporting Information

### **Probing Mechanism of Conversion Methyl Levulinate into $\gamma$ - valerolactone Catalyzed by $\text{Al}(\text{O}i\text{Pr})_3$ in Alcohol Solvent: A DFT Study**

Zhaoyang Ju<sup>a</sup>, Shaokeng Feng<sup>a</sup>, Lanhui Ren<sup>b</sup>, Tingyu Lei<sup>c</sup>, Haixiang Cheng<sup>a</sup>,  
Mengting Yu<sup>a\*</sup> and Chengsheng Ge<sup>a\*</sup>.

<sup>a</sup>*College of Chemical & Material Engineering, Quzhou University, Quzhou 324000, P.  
R. China*

<sup>b</sup>*Institute of Zhejiang University-Quzhou, Quzhou, 324000, R. P. China*

<sup>c</sup>*Institute of Coal Chemistry, Chinese Academy of Sciences, Taiyuan, 030001, R. P.  
China*

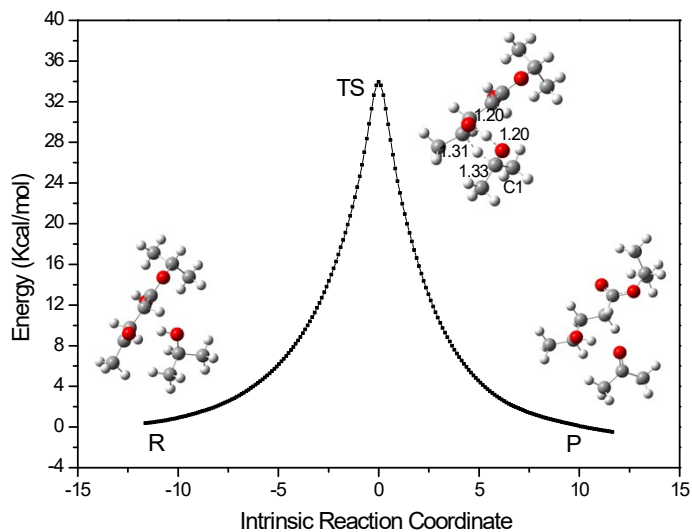

**Figure S1** IRC of inter-molecular hydrogen transfer between IPL and *i*-PrOH to form 2HIPL (maxpoint=100, stepsize=10).

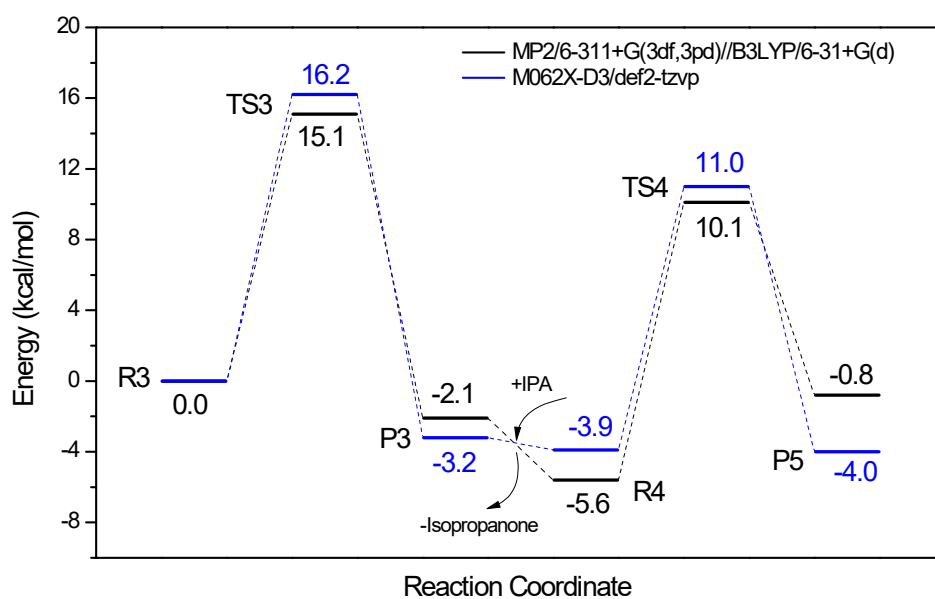

**Figure S2** Compared the free energy (kcal/mol) for the MPV hydrogenation of IPL to 2HIPL catalyzed by  $\text{Al}(\text{O}i\text{Pr})_3$  in *i*-PrOH medium at MP2/6-311+G(3df, 3pd)//B3LYP/6-31+G(d) and M06-2X-D3/def2-tzvp level.

## Coordinates and snapshots of optimized structures

### 1. The structures of reactants, TS and products in the ester change

**Table S 1** The snapshots and coordinates of of reactants, TS and products optimized at M06-2X-D3/def2-tzvp SMD=2-propanol level in the ester change.

| Ra                                                                                |           |           |           | TSa                                                                                |           |           |           |
|-----------------------------------------------------------------------------------|-----------|-----------|-----------|------------------------------------------------------------------------------------|-----------|-----------|-----------|
| 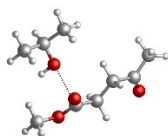 |           |           |           |  |           |           |           |
| C                                                                                 | 3.832323  | 1.366956  | 0.393825  | C                                                                                  | 4.198885  | 1.038696  | 0.139926  |
| H                                                                                 | 4.895783  | 1.327567  | 0.165631  | H                                                                                  | 5.227943  | 0.685124  | 0.118207  |
| H                                                                                 | 3.673160  | 1.511774  | 1.463448  | H                                                                                  | 3.996363  | 1.567615  | 1.072611  |
| H                                                                                 | 3.386215  | 2.224489  | -0.119009 | H                                                                                  | 4.046242  | 1.750341  | -0.676476 |
| C                                                                                 | 3.138395  | 0.125316  | -0.084540 | C                                                                                  | 3.242759  | -0.103979 | -0.041857 |
| C                                                                                 | 1.757768  | -0.116934 | 0.467504  | C                                                                                  | 1.796901  | 0.179363  | 0.278150  |
| H                                                                                 | 1.200960  | 0.823229  | 0.422443  | H                                                                                  | 1.516283  | 1.103994  | -0.235489 |
| H                                                                                 | 1.876907  | -0.342156 | 1.532503  | H                                                                                  | 1.740505  | 0.398979  | 1.349800  |
| C                                                                                 | 1.012555  | -1.226429 | -0.245038 | C                                                                                  | 0.865354  | -0.958735 | -0.096253 |
| H                                                                                 | 1.562585  | -2.170077 | -0.181904 | H                                                                                  | 1.130441  | -1.869641 | 0.444817  |
| H                                                                                 | 0.885902  | -1.003654 | -1.304765 | H                                                                                  | 0.918348  | -1.170456 | -1.163189 |
| C                                                                                 | -0.341736 | -1.468677 | 0.356134  | C                                                                                  | -0.551223 | -0.628389 | 0.292870  |
| O                                                                                 | 3.656240  | -0.634155 | -0.879519 | O                                                                                  | 3.611666  | -1.191218 | -0.438873 |
| O                                                                                 | -0.685590 | -1.140052 | 1.468189  | O                                                                                  | -0.932963 | -0.392937 | 1.419357  |
| O                                                                                 | -1.134289 | -2.150746 | -0.473633 | O                                                                                  | -1.458837 | -1.734467 | -0.538646 |
| C                                                                                 | -2.453217 | -2.441192 | 0.004180  | C                                                                                  | -2.528519 | -2.299532 | 0.213124  |
| H                                                                                 | -2.407420 | -3.064377 | 0.896958  | H                                                                                  | -2.121081 | -3.008810 | 0.933862  |
| H                                                                                 | -2.948870 | -2.975141 | -0.801863 | H                                                                                  | -3.178228 | -2.825240 | -0.485652 |
| H                                                                                 | -2.985729 | -1.516420 | 0.227801  | H                                                                                  | -3.097633 | -1.532383 | 0.738893  |
| C                                                                                 | -3.256253 | 1.506118  | 0.192023  | C                                                                                  | -3.203743 | 1.226353  | 0.020904  |
| H                                                                                 | -3.822154 | 2.378056  | 0.526651  | H                                                                                  | -3.819757 | 2.127364  | 0.045472  |
| H                                                                                 | -2.988792 | 0.907853  | 1.066911  | H                                                                                  | -3.093121 | 0.852132  | 1.038061  |
| H                                                                                 | -3.906130 | 0.909966  | -0.453630 | H                                                                                  | -3.728911 | 0.477620  | -0.577353 |
| C                                                                                 | -2.005683 | 1.938585  | -0.551843 | C                                                                                  | -1.859130 | 1.559470  | -0.603893 |
| H                                                                                 | -2.292618 | 2.556762  | -1.409922 | H                                                                                  | -2.036116 | 1.998041  | -1.589025 |
| C                                                                                 | -1.057822 | 2.721256  | 0.332124  | C                                                                                  | -1.036636 | 2.535139  | 0.216245  |
| H                                                                                 | -0.772537 | 2.123190  | 1.201576  | H                                                                                  | -0.804185 | 2.130247  | 1.201305  |

|                                                                                   |           |           |           |                                                                                    |           |           |           |
|-----------------------------------------------------------------------------------|-----------|-----------|-----------|------------------------------------------------------------------------------------|-----------|-----------|-----------|
| H                                                                                 | -0.156012 | 2.999056  | -0.216820 | H                                                                                  | -0.106349 | 2.780783  | -0.298087 |
| H                                                                                 | -1.538944 | 3.634930  | 0.685187  | H                                                                                  | -1.603257 | 3.459024  | 0.346892  |
| O                                                                                 | -1.279519 | 0.798659  | -1.030638 | O                                                                                  | -1.081024 | 0.377178  | -0.902044 |
| H                                                                                 | -1.875023 | 0.255305  | -1.562599 | H                                                                                  | -1.646121 | -0.683497 | -1.098294 |
| Pa                                                                                |           |           |           | Rb                                                                                 |           |           |           |
| 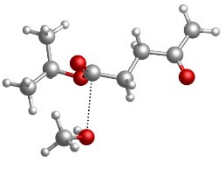 |           |           |           |  |           |           |           |
| C                                                                                 | -4.564142 | -0.833814 | -0.082179 | C                                                                                  | -1.643896 | 3.383409  | 2.014390  |
| H                                                                                 | -5.515437 | -0.313072 | 0.009645  | H                                                                                  | -1.588250 | 4.449390  | 2.225116  |
| H                                                                                 | -4.458588 | -1.579373 | 0.707181  | H                                                                                  | -0.806990 | 2.865084  | 2.490521  |
| H                                                                                 | -4.536831 | -1.365141 | -1.037910 | H                                                                                  | -2.561413 | 2.965061  | 2.435274  |
| C                                                                                 | -3.423932 | 0.141176  | -0.053107 | C                                                                                  | -1.604584 | 3.133487  | 0.535247  |
| C                                                                                 | -2.052661 | -0.444833 | 0.176860  | C                                                                                  | -1.745711 | 1.693857  | 0.111540  |
| H                                                                                 | -1.918092 | -1.272270 | -0.526974 | H                                                                                  | -2.730693 | 1.348049  | 0.434361  |
| H                                                                                 | -2.055891 | -0.891484 | 1.177138  | H                                                                                  | -1.025026 | 1.105934  | 0.689629  |
| C                                                                                 | -0.935306 | 0.586369  | 0.044689  | C                                                                                  | -1.579055 | 1.500744  | -1.388037 |
| H                                                                                 | -1.076194 | 1.393581  | 0.761641  | H                                                                                  | -0.684196 | 2.030520  | -1.731821 |
| H                                                                                 | -0.920663 | 1.002626  | -0.961726 | H                                                                                  | -2.433584 | 1.883114  | -1.942319 |
| C                                                                                 | 0.379913  | -0.079070 | 0.343342  | C                                                                                  | -1.356843 | 0.075972  | -1.760065 |
| O                                                                                 | -3.591422 | 1.331633  | -0.221580 | O                                                                                  | -1.467692 | 4.031279  | -0.271120 |
| O                                                                                 | 0.876090  | -0.135227 | 1.445610  | O                                                                                  | -0.541541 | -0.673617 | -1.199581 |
| O                                                                                 | 1.533797  | 2.432662  | -0.623937 | O                                                                                  | -2.030196 | -0.344917 | -2.783513 |
| C                                                                                 | 2.506106  | 2.673193  | 0.386938  | C                                                                                  | -1.812680 | -1.707371 | -3.212505 |
| H                                                                                 | 2.207025  | 3.582813  | 0.906757  | H                                                                                  | -0.779348 | -1.829851 | -3.531861 |
| H                                                                                 | 3.500773  | 2.826728  | -0.039645 | H                                                                                  | -2.495146 | -1.856008 | -4.042919 |
| H                                                                                 | 2.546168  | 1.855023  | 1.110516  | H                                                                                  | -2.041820 | -2.386392 | -2.392677 |
| C                                                                                 | 3.317932  | -0.769533 | -0.261025 | C                                                                                  | -3.009155 | -2.969676 | 0.349357  |
| H                                                                                 | 4.179305  | -1.423618 | -0.410928 | H                                                                                  | -3.119522 | -3.675628 | 1.175104  |
| H                                                                                 | 3.300594  | -0.454423 | 0.781076  | H                                                                                  | -1.949100 | -2.726905 | 0.236165  |
| H                                                                                 | 3.450261  | 0.105322  | -0.901297 | H                                                                                  | -3.354466 | -3.462342 | -0.562952 |
| C                                                                                 | 2.063737  | -1.533000 | -0.640465 | C                                                                                  | -3.808778 | -1.706525 | 0.613171  |
| H                                                                                 | 2.159496  | -1.877801 | -1.669766 | H                                                                                  | -4.868732 | -1.962307 | 0.719795  |
| C                                                                                 | 1.779395  | -2.728259 | 0.249738  | C                                                                                  | -3.341157 | -0.978861 | 1.855110  |

|   |          |           |           |   |           |           |           |
|---|----------|-----------|-----------|---|-----------|-----------|-----------|
| H | 1.778958 | -2.459869 | 1.304973  | H | -2.292493 | -0.692471 | 1.747052  |
| H | 0.816823 | -3.175361 | -0.006572 | H | -3.936231 | -0.079207 | 2.025248  |
| H | 2.554716 | -3.478621 | 0.085103  | H | -3.434886 | -1.624215 | 2.730313  |
| O | 0.899867 | -0.656970 | -0.740984 | O | -3.667035 | -0.788480 | -0.481466 |
| H | 1.814674 | 1.674787  | -1.150837 | H | -4.024083 | -1.205996 | -1.275804 |
|   |          |           |           | C | 2.116488  | -0.966402 | 3.296745  |
|   |          |           |           | H | 2.438155  | -1.698771 | 4.040966  |
|   |          |           |           | H | 1.687543  | -0.106145 | 3.818607  |
|   |          |           |           | H | 2.997959  | -0.631487 | 2.746625  |
|   |          |           |           | C | 1.083706  | -1.567526 | 2.355644  |
|   |          |           |           | H | 1.548041  | -2.406356 | 1.820099  |
|   |          |           |           | C | -0.113671 | -2.100810 | 3.125337  |
|   |          |           |           | H | -0.608329 | -1.286575 | 3.662671  |
|   |          |           |           | H | -0.836190 | -2.556466 | 2.446188  |
|   |          |           |           | H | 0.200585  | -2.853973 | 3.851709  |
|   |          |           |           | O | 0.654014  | -0.589933 | 1.422535  |
|   |          |           |           | C | 3.010645  | 2.170990  | 0.891768  |
|   |          |           |           | H | 3.154986  | 3.078495  | 1.482829  |
|   |          |           |           | H | 3.900028  | 2.013521  | 0.274897  |
|   |          |           |           | H | 2.908509  | 1.327906  | 1.578209  |
|   |          |           |           | C | 1.779675  | 2.290831  | 0.005727  |
|   |          |           |           | H | 0.908978  | 2.449249  | 0.658075  |
|   |          |           |           | C | 1.898718  | 3.476512  | -0.936802 |
|   |          |           |           | H | 2.789160  | 3.364480  | -1.561875 |
|   |          |           |           | H | 1.026887  | 3.543620  | -1.589924 |
|   |          |           |           | H | 1.981194  | 4.412007  | -0.378988 |
|   |          |           |           | O | 1.594221  | 1.114319  | -0.756438 |
|   |          |           |           | C | 3.803324  | -1.212628 | -2.334807 |
|   |          |           |           | H | 4.852639  | -1.435581 | -2.541975 |
|   |          |           |           | H | 3.707464  | -0.138539 | -2.154251 |
|   |          |           |           | H | 3.216244  | -1.468079 | -3.219430 |
|   |          |           |           | C | 3.310104  | -1.996808 | -1.126652 |
|   |          |           |           | H | 3.472673  | -3.063633 | -1.320167 |
|   |          |           |           | C | 4.080830  | -1.616635 | 0.129752  |
|   |          |           |           | H | 3.934732  | -0.554311 | 0.354808  |

|                                                                                   |           |           |           |                                                                                    |           |           |           |
|-----------------------------------------------------------------------------------|-----------|-----------|-----------|------------------------------------------------------------------------------------|-----------|-----------|-----------|
|                                                                                   |           |           |           | H                                                                                  | 3.740219  | -2.203659 | 0.985056  |
|                                                                                   |           |           |           | H                                                                                  | 5.151947  | -1.788189 | 0.000242  |
|                                                                                   |           |           |           | O                                                                                  | 1.918887  | -1.812542 | -0.947232 |
|                                                                                   |           |           |           | Al                                                                                 | 1.066118  | -0.465198 | -0.261354 |
| TSb                                                                               |           |           |           | Pb                                                                                 |           |           |           |
| 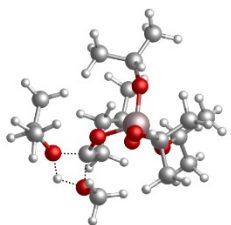 |           |           |           |  |           |           |           |
| C                                                                                 | -2.807778 | 3.331339  | 1.436559  | C                                                                                  | 4.666821  | 0.254341  | 0.708493  |
| H                                                                                 | -3.240351 | 4.318092  | 1.283219  | H                                                                                  | 5.657552  | 0.147410  | 0.271303  |
| H                                                                                 | -1.787221 | 3.437191  | 1.817633  | H                                                                                  | 4.284367  | -0.732836 | 0.987083  |
| H                                                                                 | -3.374683 | 2.776443  | 2.186159  | H                                                                                  | 4.710559  | 0.852357  | 1.620429  |
| C                                                                                 | -2.749397 | 2.569255  | 0.145941  | C                                                                                  | 3.713380  | 0.860682  | -0.277282 |
| C                                                                                 | -2.433030 | 1.098474  | 0.259590  | C                                                                                  | 2.391563  | 1.324529  | 0.285556  |
| H                                                                                 | -3.277591 | 0.623974  | 0.770361  | H                                                                                  | 2.592094  | 2.170918  | 0.950902  |
| H                                                                                 | -1.576888 | 0.996136  | 0.936177  | H                                                                                  | 1.999997  | 0.519588  | 0.917645  |
| C                                                                                 | -2.163140 | 0.451036  | -1.086877 | C                                                                                  | 1.399849  | 1.702610  | -0.814299 |
| H                                                                                 | -1.430258 | 1.037043  | -1.644297 | H                                                                                  | 1.285552  | 0.874292  | -1.512023 |
| H                                                                                 | -3.069882 | 0.383251  | -1.687192 | H                                                                                  | 1.726783  | 2.586481  | -1.356737 |
| C                                                                                 | -1.562208 | -0.922170 | -0.937610 | C                                                                                  | 0.065293  | 1.959859  | -0.200073 |
| O                                                                                 | -2.926747 | 3.106240  | -0.929332 | O                                                                                  | 3.972329  | 0.951569  | -1.459631 |
| O                                                                                 | -0.503195 | -1.074305 | -0.226014 | O                                                                                  | -0.665800 | 1.050246  | 0.232075  |
| O                                                                                 | -1.452865 | -1.518489 | -2.336034 | O                                                                                  | -0.932982 | 1.875022  | -2.700893 |
| C                                                                                 | -0.146791 | -1.957547 | -2.750205 | C                                                                                  | -1.954989 | 0.883326  | -2.744601 |
| H                                                                                 | 0.501504  | -1.084343 | -2.818849 | H                                                                                  | -1.464052 | -0.082610 | -2.639282 |
| H                                                                                 | -0.278061 | -2.401956 | -3.733780 | H                                                                                  | -2.492235 | 0.907696  | -3.696691 |
| H                                                                                 | 0.259484  | -2.684047 | -2.049131 | H                                                                                  | -2.671049 | 1.010554  | -1.928238 |
| C                                                                                 | -1.394002 | -3.802412 | 0.417614  | C                                                                                  | -2.724034 | 3.177486  | -0.050114 |
| H                                                                                 | -1.573022 | -4.626162 | 1.111290  | H                                                                                  | -3.564651 | 3.727233  | 0.377844  |
| H                                                                                 | -0.459918 | -3.313816 | 0.686524  | H                                                                                  | -2.895297 | 2.113533  | 0.106178  |
| H                                                                                 | -1.301607 | -4.225241 | -0.585345 | H                                                                                  | -2.693665 | 3.390244  | -1.119399 |
| C                                                                                 | -2.576588 | -2.856369 | 0.493568  | C                                                                                  | -1.464814 | 3.656700  | 0.639977  |
| H                                                                                 | -3.495519 | -3.424088 | 0.345416  | H                                                                                  | -1.371814 | 4.734172  | 0.518295  |

|   |           |           |           |   |           |           |           |
|---|-----------|-----------|-----------|---|-----------|-----------|-----------|
| C | -2.669584 | -2.070298 | 1.782282  | C | -1.391276 | 3.304821  | 2.109923  |
| H | -1.822695 | -1.394383 | 1.891626  | H | -1.583666 | 2.247361  | 2.279484  |
| H | -3.596520 | -1.497118 | 1.822464  | H | -0.416393 | 3.569648  | 2.522609  |
| H | -2.661177 | -2.769561 | 2.620307  | H | -2.152049 | 3.881606  | 2.638408  |
| O | -2.633645 | -1.931423 | -0.648787 | O | -0.243523 | 3.205945  | -0.057408 |
| H | -2.248696 | -2.262532 | -1.767213 | H | -1.329528 | 2.735101  | -2.881340 |
| C | 1.920755  | 0.939952  | 3.809598  | C | 1.360635  | -1.781322 | 3.662941  |
| H | 2.373829  | 0.497365  | 4.699479  | H | 1.151304  | -1.951156 | 4.721215  |
| H | 1.015527  | 1.474855  | 4.110876  | H | 2.085452  | -0.966037 | 3.579023  |
| H | 2.623589  | 1.663403  | 3.390455  | H | 1.812557  | -2.686248 | 3.251562  |
| C | 1.576981  | -0.125522 | 2.781948  | C | 0.091658  | -1.430855 | 2.904136  |
| H | 2.504264  | -0.641923 | 2.497282  | H | -0.624264 | -2.255099 | 3.026152  |
| C | 0.620718  | -1.162431 | 3.352862  | C | -0.548471 | -0.160846 | 3.445695  |
| H | -0.319775 | -0.685256 | 3.642609  | H | 0.129230  | 0.687073  | 3.308886  |
| H | 0.402604  | -1.934262 | 2.609531  | H | -1.484837 | 0.052343  | 2.923060  |
| H | 1.049369  | -1.648358 | 4.232711  | H | -0.772434 | -0.257009 | 4.510562  |
| O | 1.014416  | 0.497947  | 1.643161  | O | 0.408176  | -1.292730 | 1.533425  |
| C | 1.957470  | 3.210046  | -0.261135 | C | 1.492998  | -3.304804 | -1.130679 |
| H | 1.722480  | 4.252337  | -0.031697 | H | 2.497642  | -3.711734 | -1.268020 |
| H | 2.812645  | 3.191089  | -0.942257 | H | 0.807074  | -3.848932 | -1.786054 |
| H | 2.239119  | 2.707326  | 0.665929  | H | 1.193707  | -3.476097 | -0.094630 |
| C | 0.766279  | 2.514979  | -0.906634 | C | 1.456641  | -1.820256 | -1.463104 |
| H | -0.085938 | 2.584439  | -0.212594 | H | 2.152447  | -1.302154 | -0.786020 |
| C | 0.383138  | 3.200919  | -2.208631 | C | 1.897038  | -1.569534 | -2.896396 |
| H | 1.229156  | 3.176819  | -2.901585 | H | 1.242221  | -2.112967 | -3.583587 |
| H | -0.461829 | 2.702006  | -2.686802 | H | 1.843453  | -0.507180 | -3.143680 |
| H | 0.110034  | 4.243882  | -2.032623 | H | 2.923481  | -1.907855 | -3.054735 |
| O | 1.058785  | 1.153678  | -1.163890 | O | 0.149695  | -1.304483 | -1.289716 |
| C | 3.644173  | -1.267769 | -2.181281 | C | -3.277203 | -2.316762 | -1.527861 |
| H | 4.682231  | -1.256851 | -2.522298 | H | -3.912775 | -3.166353 | -1.788390 |
| H | 3.143771  | -0.375556 | -2.568452 | H | -2.325529 | -2.422899 | -2.055735 |
| H | 3.154379  | -2.150033 | -2.599419 | H | -3.764920 | -1.403070 | -1.874573 |
| C | 3.567493  | -1.286546 | -0.660657 | C | -3.040974 | -2.258258 | -0.025036 |
| H | 4.095001  | -2.178711 | -0.300850 | H | -4.015459 | -2.191657 | 0.473109  |
| C | 4.246926  | -0.060653 | -0.062977 | C | -2.334597 | -3.512806 | 0.470156  |

|                                                                                   |           |           |           |                                                                                    |           |           |           |
|-----------------------------------------------------------------------------------|-----------|-----------|-----------|------------------------------------------------------------------------------------|-----------|-----------|-----------|
| H                                                                                 | 3.788240  | 0.855237  | -0.447605 | H                                                                                  | -1.366274 | -3.628011 | -0.029358 |
| H                                                                                 | 4.161256  | -0.062476 | 1.026431  | H                                                                                  | -2.166377 | -3.462972 | 1.548200  |
| H                                                                                 | 5.308485  | -0.040671 | -0.320590 | H                                                                                  | -2.927468 | -4.405189 | 0.256866  |
| O                                                                                 | 2.222171  | -1.396037 | -0.243506 | O                                                                                  | -2.316333 | -1.091353 | 0.318702  |
| Al                                                                                | 1.043446  | -0.137702 | 0.015197  | Al                                                                                 | -0.605412 | -0.822827 | 0.200975  |
| R1                                                                                |           |           |           | TS1                                                                                |           |           |           |
| 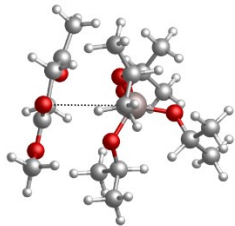 |           |           |           |  |           |           |           |
| C                                                                                 | -3.213658 | 3.031080  | 0.784756  | C                                                                                  | -5.991405 | -0.385719 | -1.198869 |
| H                                                                                 | -3.469450 | 3.944608  | 0.251120  | H                                                                                  | -6.628565 | -1.268275 | -1.204120 |
| H                                                                                 | -2.219809 | 3.124261  | 1.229509  | H                                                                                  | -5.727510 | -0.098831 | -2.217720 |
| H                                                                                 | -3.916941 | 2.865657  | 1.604389  | H                                                                                  | -6.540112 | 0.450140  | -0.755205 |
| C                                                                                 | -3.225949 | 1.849939  | -0.141252 | C                                                                                  | -4.758349 | -0.629314 | -0.376209 |
| C                                                                                 | -2.999957 | 0.507994  | 0.501423  | C                                                                                  | -3.635636 | 0.361418  | -0.544748 |
| H                                                                                 | -3.859144 | 0.305723  | 1.150316  | H                                                                                  | -4.058203 | 1.365349  | -0.431334 |
| H                                                                                 | -2.130911 | 0.592853  | 1.159564  | H                                                                                  | -3.299164 | 0.291752  | -1.584827 |
| C                                                                                 | -2.796055 | -0.598666 | -0.510306 | C                                                                                  | -2.476442 | 0.122404  | 0.411536  |
| H                                                                                 | -1.998138 | -0.328838 | -1.204066 | H                                                                                  | -2.045756 | -0.861341 | 0.235712  |
| H                                                                                 | -3.692673 | -0.780468 | -1.107230 | H                                                                                  | -2.817789 | 0.182276  | 1.444931  |
| C                                                                                 | -2.391514 | -1.890348 | 0.135204  | C                                                                                  | -1.396270 | 1.155209  | 0.170122  |
| O                                                                                 | -3.423441 | 1.974114  | -1.334916 | O                                                                                  | -4.681388 | -1.566599 | 0.393751  |
| O                                                                                 | -2.223637 | -2.063420 | 1.320688  | O                                                                                  | -0.767171 | 1.193305  | -0.928071 |
| O                                                                                 | -2.253204 | -2.871182 | -0.761695 | O                                                                                  | -1.745371 | 2.317009  | 0.792550  |
| C                                                                                 | -1.804480 | -4.132028 | -0.252303 | C                                                                                  | -0.901924 | 3.441869  | 0.579953  |
| H                                                                                 | -1.741429 | -4.794850 | -1.111017 | H                                                                                  | -1.400421 | 4.285494  | 1.053611  |
| H                                                                                 | -2.518368 | -4.526816 | 0.470705  | H                                                                                  | -0.766948 | 3.641918  | -0.483220 |
| H                                                                                 | -0.826250 | -4.022853 | 0.216666  | H                                                                                  | 0.067292  | 3.282497  | 1.054025  |
| C                                                                                 | 4.309259  | 0.372426  | -1.435113 | C                                                                                  | 3.611392  | -1.326328 | 2.402349  |
| H                                                                                 | 5.145435  | -0.291238 | -1.669117 | H                                                                                  | 4.474056  | -0.885973 | 2.909318  |
| H                                                                                 | 4.705699  | 1.373858  | -1.243123 | H                                                                                  | 3.857376  | -2.359295 | 2.138050  |
| H                                                                                 | 3.658668  | 0.426568  | -2.310632 | H                                                                                  | 2.773296  | -1.348629 | 3.102807  |
| C                                                                                 | 3.537574  | -0.116750 | -0.215588 | C                                                                                  | 3.246114  | -0.548762 | 1.141411  |



|    |           |           |           |    |           |           |           |
|----|-----------|-----------|-----------|----|-----------|-----------|-----------|
| H  | 3.163408  | -1.130495 | -0.427108 | H  | 3.040937  | 0.494833  | 1.438949  |
| C  | 4.452677  | -0.196302 | 0.999764  | C  | 4.430616  | -0.531264 | 0.176145  |
| H  | 4.840986  | 0.798668  | 1.236432  | H  | 4.708267  | -1.557968 | -0.082633 |
| H  | 3.908743  | -0.566884 | 1.871166  | H  | 4.162051  | -0.006618 | -0.741878 |
| H  | 5.298977  | -0.862372 | 0.813763  | H  | 5.301405  | -0.042209 | 0.622108  |
| O  | 2.460881  | 0.751760  | 0.043966  | O  | 2.112536  | -1.121309 | 0.549063  |
| C  | 0.197684  | -0.184403 | 4.134983  | C  | 1.541096  | 2.629157  | -2.889292 |
| H  | 0.770867  | -0.580584 | 4.976555  | H  | 2.027337  | 3.537268  | -3.255599 |
| H  | -0.743530 | -0.737355 | 4.063797  | H  | 0.597448  | 2.905566  | -2.413994 |
| H  | -0.035784 | 0.862779  | 4.339703  | H  | 1.317722  | 1.989175  | -3.746001 |
| C  | 0.970023  | -0.309659 | 2.830528  | C  | 2.438565  | 1.889512  | -1.900639 |
| H  | 1.910689  | 0.253232  | 2.935670  | H  | 3.405066  | 1.721154  | -2.401670 |
| C  | 1.324915  | -1.764153 | 2.541704  | C  | 2.708170  | 2.744514  | -0.668779 |
| H  | 0.411949  | -2.356918 | 2.435826  | H  | 1.775329  | 2.905465  | -0.123224 |
| H  | 1.894079  | -1.849510 | 1.612021  | H  | 3.417864  | 2.250062  | -0.001994 |
| H  | 1.927088  | -2.189161 | 3.349062  | H  | 3.118733  | 3.719630  | -0.943878 |
| O  | 0.202342  | 0.249812  | 1.790381  | O  | 1.912175  | 0.641980  | -1.562481 |
| C  | 0.619777  | 3.568715  | 0.534359  | C  | 1.559419  | -2.717488 | -2.453910 |
| H  | 0.704366  | 4.657335  | 0.485110  | H  | 1.762830  | -3.695705 | -2.897804 |
| H  | 1.620477  | 3.153334  | 0.685155  | H  | 2.406232  | -2.440336 | -1.820749 |
| H  | 0.010604  | 3.311759  | 1.403695  | H  | 1.480470  | -1.984706 | -3.259891 |
| C  | 0.004191  | 3.012122  | -0.745624 | C  | 0.270855  | -2.750004 | -1.638016 |
| H  | -0.968792 | 3.502013  | -0.895414 | H  | -0.534841 | -3.073869 | -2.313414 |
| C  | 0.876846  | 3.337560  | -1.952520 | C  | 0.354373  | -3.779928 | -0.516251 |
| H  | 1.864671  | 2.882391  | -1.835549 | H  | 1.169581  | -3.531026 | 0.166224  |
| H  | 0.423559  | 2.944427  | -2.865195 | H  | -0.579891 | -3.797674 | 0.050402  |
| H  | 1.005201  | 4.416675  | -2.070205 | H  | 0.526575  | -4.781966 | -0.918740 |
| O  | -0.227746 | 1.626914  | -0.663203 | O  | -0.080913 | -1.480540 | -1.151260 |
| Al | 0.733761  | 0.368172  | 0.112176  | Al | 0.877276  | -0.190861 | -0.399098 |
| C  | 1.299681  | -2.885427 | -2.122316 | C  | -0.578916 | 1.128561  | 3.373998  |
| H  | 0.436069  | -3.532931 | -1.945222 | H  | -1.661973 | 1.125016  | 3.238510  |
| H  | 2.060214  | -3.116424 | -1.372437 | H  | -0.209405 | 2.137569  | 3.181228  |
| H  | 1.706418  | -3.112987 | -3.110644 | H  | -0.365255 | 0.877529  | 4.415390  |
| C  | 0.877258  | -1.427470 | -2.018158 | C  | 0.096953  | 0.116529  | 2.461614  |
| H  | 1.755757  | -0.802524 | -2.242281 | H  | 1.165775  | 0.110476  | 2.692207  |

|                                                                                   |           |           |           |                                                                                    |           |           |           |
|-----------------------------------------------------------------------------------|-----------|-----------|-----------|------------------------------------------------------------------------------------|-----------|-----------|-----------|
| C                                                                                 | -0.192834 | -1.100714 | -3.053741 | C                                                                                  | -0.446828 | -1.287479 | 2.682038  |
| H                                                                                 | -1.076156 | -1.724700 | -2.894069 | H                                                                                  | -1.533453 | -1.315332 | 2.581168  |
| H                                                                                 | -0.491710 | -0.052342 | -2.984445 | H                                                                                  | -0.009417 | -1.982617 | 1.963642  |
| H                                                                                 | 0.181171  | -1.282694 | -4.064667 | H                                                                                  | -0.193590 | -1.628811 | 3.688997  |
| O                                                                                 | 0.423863  | -1.168363 | -0.706580 | O                                                                                  | -0.002197 | 0.525141  | 1.098221  |
| P1                                                                                |           |           |           | R2                                                                                 |           |           |           |
| 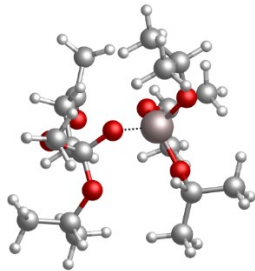 |           |           |           |  |           |           |           |
| C                                                                                 | 1.600734  | 3.996800  | 0.447117  | C                                                                                  | -4.473867 | 2.372477  | -0.377729 |
| H                                                                                 | 2.059572  | 4.721992  | -0.222651 | H                                                                                  | -5.531646 | 2.536506  | -0.180732 |
| H                                                                                 | 2.288549  | 3.166446  | 0.627382  | H                                                                                  | -4.132462 | 3.004508  | -1.199593 |
| H                                                                                 | 1.387080  | 4.458309  | 1.414173  | H                                                                                  | -3.893980 | 2.652631  | 0.508225  |
| C                                                                                 | 0.340309  | 3.438587  | -0.147384 | C                                                                                  | -4.197479 | 0.926091  | -0.666607 |
| C                                                                                 | -0.497948 | 2.579331  | 0.762020  | C                                                                                  | -2.861054 | 0.626059  | -1.297646 |
| H                                                                                 | -1.063465 | 3.266784  | 1.401474  | H                                                                                  | -2.134788 | 1.365389  | -0.958518 |
| H                                                                                 | 0.176872  | 2.031430  | 1.419682  | H                                                                                  | -3.010643 | 0.845743  | -2.361573 |
| C                                                                                 | -1.424766 | 1.626060  | 0.015919  | C                                                                                  | -2.339932 | -0.799550 | -1.114073 |
| H                                                                                 | -0.997601 | 1.389816  | -0.959307 | H                                                                                  | -2.148193 | -1.240060 | -2.092622 |
| H                                                                                 | -2.397080 | 2.086413  | -0.147070 | H                                                                                  | -3.095146 | -1.417648 | -0.624482 |
| C                                                                                 | -1.596129 | 0.306495  | 0.768814  | C                                                                                  | -1.005165 | -0.895072 | -0.346478 |
| O                                                                                 | 0.004258  | 3.697921  | -1.288194 | O                                                                                  | -5.011246 | 0.059038  | -0.412822 |
| O                                                                                 | -0.411803 | -0.292915 | 1.062100  | O                                                                                  | -0.163581 | 0.088462  | -0.734546 |
| O                                                                                 | -2.280943 | 0.632334  | 1.964607  | O                                                                                  | -1.171860 | -0.886549 | 1.073024  |
| C                                                                                 | -2.417012 | -0.434979 | 2.887967  | C                                                                                  | -1.964486 | 0.156078  | 1.609220  |
| H                                                                                 | -3.169294 | -0.128034 | 3.614172  | H                                                                                  | -3.028696 | -0.013762 | 1.417761  |
| H                                                                                 | -1.477219 | -0.629868 | 3.409301  | H                                                                                  | -1.657945 | 1.132248  | 1.226494  |
| H                                                                                 | -2.747611 | -1.351732 | 2.394833  | H                                                                                  | -1.808797 | 0.146440  | 2.688013  |
| C                                                                                 | -1.188707 | -3.175717 | -2.132136 | C                                                                                  | 2.565920  | -0.403111 | -2.769513 |
| H                                                                                 | -1.623110 | -4.168739 | -1.993238 | H                                                                                  | 3.286498  | -0.929951 | -3.400112 |
| H                                                                                 | -0.856761 | -3.085699 | -3.170656 | H                                                                                  | 1.792993  | 0.030038  | -3.410931 |
| H                                                                                 | -1.963761 | -2.428960 | -1.952521 | H                                                                                  | 2.091478  | -1.135669 | -2.111562 |
| C                                                                                 | -0.010782 | -2.951591 | -1.195034 | C                                                                                  | 3.247528  | 0.693718  | -1.958411 |

|    |           |           |           |    |           |           |           |
|----|-----------|-----------|-----------|----|-----------|-----------|-----------|
| H  | -0.372605 | -3.061046 | -0.160196 | H  | 3.995968  | 0.216168  | -1.308569 |
| C  | 1.076535  | -3.992780 | -1.430152 | C  | 3.967106  | 1.679190  | -2.866180 |
| H  | 1.446265  | -3.915253 | -2.456690 | H  | 3.254919  | 2.141653  | -3.555700 |
| H  | 1.915253  | -3.832593 | -0.750271 | H  | 4.435010  | 2.469460  | -2.275412 |
| H  | 0.694914  | -5.005166 | -1.275570 | H  | 4.743693  | 1.182582  | -3.452702 |
| O  | 0.506329  | -1.651533 | -1.391124 | O  | 2.317583  | 1.396451  | -1.164262 |
| C  | 2.726572  | 0.155078  | 2.552651  | C  | 3.293367  | -2.426159 | 1.981216  |
| H  | 3.159517  | 0.305883  | 3.544484  | H  | 3.148069  | -3.198084 | 2.740768  |
| H  | 1.735729  | 0.619533  | 2.538262  | H  | 4.159632  | -1.820637 | 2.263068  |
| H  | 3.356840  | 0.665605  | 1.821592  | H  | 3.512844  | -2.917189 | 1.030490  |
| C  | 2.620457  | -1.330849 | 2.226483  | C  | 2.060435  | -1.544773 | 1.846998  |
| H  | 3.631665  | -1.757112 | 2.276789  | H  | 1.210924  | -2.185724 | 1.574751  |
| C  | 1.757986  | -2.057139 | 3.251600  | C  | 1.729868  | -0.857228 | 3.165488  |
| H  | 0.745341  | -1.645556 | 3.248742  | H  | 2.549227  | -0.194987 | 3.459802  |
| H  | 1.696215  | -3.119961 | 3.007820  | H  | 0.822007  | -0.256735 | 3.071686  |
| H  | 2.170884  | -1.958249 | 4.258602  | H  | 1.572008  | -1.590393 | 3.960669  |
| O  | 2.129305  | -1.553079 | 0.925720  | O  | 2.286601  | -0.604770 | 0.825098  |
| C  | 3.661090  | 0.377612  | -1.671674 | C  | -0.317914 | 3.514401  | -0.135828 |
| H  | 4.331563  | 0.658491  | -2.487662 | H  | -0.391723 | 4.572280  | -0.400776 |
| H  | 3.411715  | -0.682439 | -1.784512 | H  | -1.291417 | 3.186312  | 0.240513  |
| H  | 4.195101  | 0.504650  | -0.727255 | H  | -0.092141 | 2.953592  | -1.046322 |
| C  | 2.389921  | 1.219558  | -1.690511 | C  | 0.760415  | 3.295179  | 0.921085  |
| H  | 2.679784  | 2.276429  | -1.596406 | H  | 1.707296  | 3.682082  | 0.516500  |
| C  | 1.647467  | 1.058502  | -3.012355 | C  | 0.433653  | 4.066322  | 2.190743  |
| H  | 1.394198  | 0.008430  | -3.174760 | H  | -0.514216 | 3.711053  | 2.606136  |
| H  | 0.721828  | 1.638255  | -2.999237 | H  | 1.213241  | 3.916708  | 2.940696  |
| H  | 2.258573  | 1.405413  | -3.849579 | H  | 0.345464  | 5.137134  | 1.993015  |
| O  | 1.555927  | 0.916862  | -0.599814 | O  | 0.908411  | 1.930283  | 1.242405  |
| Al | 0.962200  | -0.635297 | -0.023563 | Al | 1.319995  | 0.657905  | 0.091436  |
| C  | -4.625361 | 0.308232  | 0.253540  | C  | -0.091551 | -4.398943 | -1.098883 |
| H  | -4.369965 | 1.352027  | 0.435975  | H  | 0.721430  | -4.496481 | -0.374872 |
| H  | -4.745503 | -0.192457 | 1.215166  | H  | 0.333916  | -4.111950 | -2.061849 |
| H  | -5.583731 | 0.280646  | -0.270110 | H  | -0.576403 | -5.370353 | -1.208519 |
| C  | -3.591286 | -0.400269 | -0.610337 | C  | -1.091131 | -3.359318 | -0.626413 |
| H  | -3.959571 | -1.414460 | -0.786052 | H  | -1.894960 | -3.287185 | -1.365675 |

|                                                                                   |           |           |           |                                                                                    |           |           |           |
|-----------------------------------------------------------------------------------|-----------|-----------|-----------|------------------------------------------------------------------------------------|-----------|-----------|-----------|
| C                                                                                 | -3.432146 | 0.256036  | -1.979185 | C                                                                                  | -1.685540 | -3.740524 | 0.720851  |
| H                                                                                 | -3.290759 | 1.334784  | -1.917933 | H                                                                                  | -0.906804 | -3.767661 | 1.486877  |
| H                                                                                 | -2.584261 | -0.177413 | -2.513073 | H                                                                                  | -2.458626 | -3.043833 | 1.041887  |
| H                                                                                 | -4.333984 | 0.071750  | -2.567639 | H                                                                                  | -2.129235 | -4.735662 | 0.640900  |
| O                                                                                 | -2.334496 | -0.662502 | 0.033731  | O                                                                                  | -0.358379 | -2.126711 | -0.613078 |
| TS2                                                                               |           |           |           | P2                                                                                 |           |           |           |
| 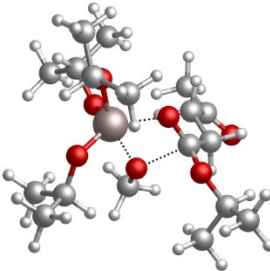 |           |           |           |  |           |           |           |
| C                                                                                 | -3.164500 | 3.746192  | 0.036273  | C                                                                                  | -0.042489 | 4.359296  | -0.451357 |
| H                                                                                 | -4.080082 | 4.270765  | 0.302826  | H                                                                                  | -0.132842 | 5.135691  | -1.208717 |
| H                                                                                 | -2.730456 | 4.185012  | -0.864667 | H                                                                                  | 0.093294  | 4.811772  | 0.533744  |
| H                                                                                 | -2.428402 | 3.856326  | 0.837213  | H                                                                                  | -0.961598 | 3.767999  | -0.410805 |
| C                                                                                 | -3.435569 | 2.286143  | -0.185358 | C                                                                                  | 1.111074  | 3.448788  | -0.756566 |
| C                                                                                 | -2.261545 | 1.455134  | -0.626397 | C                                                                                  | 1.363614  | 2.348035  | 0.238785  |
| H                                                                                 | -1.441573 | 1.625246  | 0.080019  | H                                                                                  | 0.419414  | 1.811787  | 0.384282  |
| H                                                                                 | -1.906322 | 1.855473  | -1.581399 | H                                                                                  | 1.590636  | 2.816724  | 1.201277  |
| C                                                                                 | -2.585101 | -0.021269 | -0.730075 | C                                                                                  | 2.464335  | 1.403790  | -0.194245 |
| H                                                                                 | -3.222407 | -0.223281 | -1.598038 | H                                                                                  | 3.415642  | 1.933513  | -0.306194 |
| H                                                                                 | -3.140268 | -0.352818 | 0.147107  | H                                                                                  | 2.229580  | 0.970812  | -1.165995 |
| C                                                                                 | -1.351816 | -0.859715 | -0.892089 | C                                                                                  | 2.674256  | 0.301143  | 0.809000  |
| O                                                                                 | -4.537897 | 1.805205  | -0.001869 | O                                                                                  | 1.794004  | 3.589170  | -1.753586 |
| O                                                                                 | -0.284566 | -0.403926 | -1.381594 | O                                                                                  | 2.184475  | 0.308504  | 1.915777  |
| O                                                                                 | -0.541846 | -0.507522 | 0.972792  | O                                                                                  | -0.122594 | -0.313990 | -1.161689 |
| C                                                                                 | -1.111636 | -0.010259 | 2.140147  | C                                                                                  | -0.232656 | 0.612473  | -2.207377 |
| H                                                                                 | -2.201911 | 0.104769  | 2.031247  | H                                                                                  | 0.737058  | 0.752792  | -2.700888 |
| H                                                                                 | -0.714631 | 0.977461  | 2.402775  | H                                                                                  | -0.576696 | 1.598615  | -1.864390 |
| H                                                                                 | -0.945299 | -0.680753 | 2.996484  | H                                                                                  | -0.936414 | 0.278219  | -2.982156 |
| C                                                                                 | 2.459227  | -1.609465 | -2.548037 | C                                                                                  | 0.537012  | -3.100010 | 0.654085  |
| H                                                                                 | 3.206747  | -2.278303 | -2.983805 | H                                                                                  | 0.810509  | -4.148333 | 0.798835  |
| H                                                                                 | 1.785498  | -1.276146 | -3.342966 | H                                                                                  | 1.442993  | -2.488561 | 0.700497  |
| H                                                                                 | 1.872460  | -2.179491 | -1.824000 | H                                                                                  | 0.106210  | -2.996571 | -0.345992 |
| C                                                                                 | 3.123350  | -0.406823 | -1.878398 | C                                                                                  | -0.445728 | -2.631679 | 1.719884  |

|    |           |           |           |    |           |           |           |
|----|-----------|-----------|-----------|----|-----------|-----------|-----------|
| H  | 3.798713  | -0.798259 | -1.101597 | H  | -1.366260 | -3.227494 | 1.626613  |
| C  | 3.974317  | 0.359485  | -2.885804 | C  | 0.120578  | -2.844650 | 3.115140  |
| H  | 3.341372  | 0.750238  | -3.688524 | H  | 1.055828  | -2.287657 | 3.222788  |
| H  | 4.466702  | 1.205223  | -2.399480 | H  | -0.582129 | -2.484734 | 3.869663  |
| H  | 4.743593  | -0.277214 | -3.330437 | H  | 0.321237  | -3.901580 | 3.305258  |
| O  | 2.191205  | 0.464530  | -1.308226 | O  | -0.750794 | -1.265295 | 1.555650  |
| C  | 2.870806  | -2.816687 | 2.300120  | C  | -3.835926 | -2.912381 | -2.116682 |
| H  | 2.736873  | -3.291317 | 3.275731  | H  | -4.134283 | -2.994206 | -3.164434 |
| H  | 3.907667  | -2.476010 | 2.222125  | H  | -4.738962 | -2.902979 | -1.499476 |
| H  | 2.700396  | -3.568952 | 1.526385  | H  | -3.251050 | -3.796659 | -1.854486 |
| C  | 1.920976  | -1.639807 | 2.117354  | C  | -3.025690 | -1.649096 | -1.870627 |
| H  | 0.891333  | -2.010564 | 2.218686  | H  | -2.132604 | -1.688368 | -2.512987 |
| C  | 2.149938  | -0.590835 | 3.201808  | C  | -3.823423 | -0.404994 | -2.246323 |
| H  | 3.177559  | -0.218136 | 3.146667  | H  | -4.733145 | -0.350067 | -1.640838 |
| H  | 1.475575  | 0.257183  | 3.062191  | H  | -3.241473 | 0.502373  | -2.063551 |
| H  | 1.983952  | -1.003077 | 4.201111  | H  | -4.108754 | -0.420974 | -3.301457 |
| O  | 2.109685  | -1.085926 | 0.842762  | O  | -2.632654 | -1.605373 | -0.517154 |
| C  | 0.885374  | 3.594052  | -0.877366 | C  | -1.604990 | 1.993067  | 2.677139  |
| H  | 1.432096  | 4.492172  | -1.177515 | H  | -2.083154 | 2.214972  | 3.634554  |
| H  | -0.133428 | 3.886656  | -0.603977 | H  | -1.182127 | 2.920398  | 2.278530  |
| H  | 0.830839  | 2.923139  | -1.737516 | H  | -0.787220 | 1.290405  | 2.852060  |
| C  | 1.559338  | 2.899408  | 0.302239  | C  | -2.599531 | 1.408977  | 1.682445  |
| H  | 2.581942  | 2.636034  | -0.001104 | H  | -3.032171 | 0.499630  | 2.127355  |
| C  | 1.643959  | 3.839619  | 1.498829  | C  | -3.734695 | 2.382498  | 1.402269  |
| H  | 0.638709  | 4.138106  | 1.812759  | H  | -3.335587 | 3.305716  | 0.971765  |
| H  | 2.129633  | 3.340441  | 2.340793  | H  | -4.441837 | 1.950867  | 0.690401  |
| H  | 2.212486  | 4.742051  | 1.260319  | H  | -4.276332 | 2.634749  | 2.317076  |
| O  | 0.846742  | 1.749108  | 0.671362  | O  | -1.942557 | 1.092565  | 0.474389  |
| Al | 1.014433  | 0.087914  | 0.029018  | Al | -1.360735 | -0.527986 | 0.083100  |
| C  | -2.621594 | -4.209916 | -1.203259 | C  | 5.399496  | -1.577121 | -0.596091 |
| H  | -1.732654 | -4.774456 | -0.914685 | H  | 5.240821  | -2.546907 | -0.120148 |
| H  | -2.613320 | -4.067049 | -2.284343 | H  | 6.051036  | -0.974366 | 0.037883  |
| H  | -3.505017 | -4.791788 | -0.936845 | H  | 5.898315  | -1.737720 | -1.553108 |
| C  | -2.655927 | -2.878467 | -0.485552 | C  | 4.076223  | -0.879474 | -0.824508 |
| H  | -3.530769 | -2.313134 | -0.807866 | H  | 4.256954  | 0.104802  | -1.256215 |

|   |           |           |           |   |          |           |           |
|---|-----------|-----------|-----------|---|----------|-----------|-----------|
| C | -2.636635 | -3.028220 | 1.021857  | C | 3.134492 | -1.683153 | -1.698575 |
| H | -1.726833 | -3.544945 | 1.335360  | H | 2.995696 | -2.682153 | -1.279584 |
| H | -2.681792 | -2.064341 | 1.527679  | H | 2.156378 | -1.205352 | -1.783278 |
| H | -3.499188 | -3.620924 | 1.331722  | H | 3.562571 | -1.783435 | -2.697788 |
| O | -1.463971 | -2.175174 | -0.932153 | O | 3.485661 | -0.714703 | 0.494267  |

## 2. The structures of reactants, TS and products in Meerwein-Ponndorf-Verley (MPV) Hydrogenation

**Table S 2** The snapshots and coordinates of of reactants, TS and products optimized at M06-2X-D3/def2-tzvp SMD=2-propanol level in the MPV hydrogenation.

| Rc                                                                                 |           |           |           | TSc                                                                                 |           |           |           |
|------------------------------------------------------------------------------------|-----------|-----------|-----------|-------------------------------------------------------------------------------------|-----------|-----------|-----------|
| 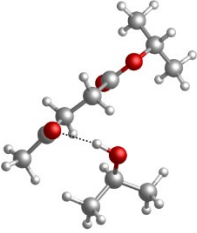 |           |           |           |  |           |           |           |
| H                                                                                  | 3.698279  | -2.861400 | -0.278073 | H                                                                                   | -4.017878 | 1.760665  | -0.568006 |
| C                                                                                  | 2.812525  | -2.525424 | -0.813702 | C                                                                                   | -2.989326 | 1.994392  | -0.842152 |
| C                                                                                  | 1.862085  | -1.834553 | 0.116278  | C                                                                                   | -2.015063 | 1.204698  | 0.000700  |
| H                                                                                  | 2.325944  | -3.360684 | -1.319348 | H                                                                                   | -2.814424 | 3.056574  | -0.650557 |
| H                                                                                  | 3.109977  | -1.807912 | -1.585403 | H                                                                                   | -2.837992 | 1.804846  | -1.905273 |
| C                                                                                  | 0.460364  | -1.621278 | -0.390354 | C                                                                                   | -0.567764 | 1.254175  | -0.472190 |
| C                                                                                  | -0.379125 | -0.747746 | 0.518657  | C                                                                                   | 0.395802  | 0.638276  | 0.527069  |
| H                                                                                  | 0.010130  | -2.611780 | -0.514255 | H                                                                                   | -0.315460 | 2.306292  | -0.640838 |
| H                                                                                  | 0.528722  | -1.202758 | -1.398850 | H                                                                                   | -0.490825 | 0.757782  | -1.441446 |
| C                                                                                  | -1.749579 | -0.487793 | -0.047286 | C                                                                                   | 1.758939  | 0.395649  | -0.064544 |
| H                                                                                  | 0.095931  | 0.222975  | 0.684985  | H                                                                                   | 0.028183  | -0.320416 | 0.901646  |
| H                                                                                  | -0.501403 | -1.200805 | 1.504654  | H                                                                                   | 0.518163  | 1.273984  | 1.405958  |
| O                                                                                  | -2.144686 | -0.900291 | -1.113871 | O                                                                                   | 2.061849  | 0.619479  | -1.214437 |
| O                                                                                  | -2.471434 | 0.265184  | 0.778928  | O                                                                                   | 2.592128  | -0.108194 | 0.843536  |
| O                                                                                  | 2.216292  | -1.447303 | 1.215810  | O                                                                                   | -2.225054 | 1.202288  | 1.297999  |
| C                                                                                  | 2.619319  | 1.466498  | -0.122144 | C                                                                                   | -2.766442 | -1.194063 | 0.057863  |
| O                                                                                  | 2.288918  | 1.455332  | 1.270074  | O                                                                                   | -2.643704 | -1.110196 | 1.362588  |
| H                                                                                  | 1.954827  | 0.770529  | -0.651816 | H                                                                                   | -2.323458 | -0.015822 | -0.374264 |
| H                                                                                  | 2.299952  | 0.533331  | 1.567970  | H                                                                                   | -2.457436 | 0.054428  | 1.562702  |

|                                                                                     |           |           |           |                                                                                      |           |           |           |
|-------------------------------------------------------------------------------------|-----------|-----------|-----------|--------------------------------------------------------------------------------------|-----------|-----------|-----------|
| C                                                                                   | 2.353997  | 2.868935  | -0.627972 | C                                                                                    | -1.804139 | -2.108549 | -0.664486 |
| H                                                                                   | 2.985436  | 3.584755  | -0.095755 | H                                                                                    | -2.112911 | -3.139499 | -0.467702 |
| H                                                                                   | 2.573581  | 2.939601  | -1.694387 | H                                                                                    | -1.830479 | -1.943210 | -1.741326 |
| H                                                                                   | 1.309168  | 3.143043  | -0.470309 | H                                                                                    | -0.787078 | -1.979462 | -0.296261 |
| C                                                                                   | 4.061563  | 1.039459  | -0.335836 | C                                                                                    | -4.176468 | -1.153435 | -0.484705 |
| H                                                                                   | 4.300819  | 1.008774  | -1.401089 | H                                                                                    | -4.192748 | -0.955441 | -1.556705 |
| H                                                                                   | 4.736968  | 1.747773  | 0.150931  | H                                                                                    | -4.633982 | -2.130932 | -0.305429 |
| H                                                                                   | 4.240316  | 0.047210  | 0.085276  | H                                                                                    | -4.762497 | -0.399083 | 0.041188  |
| C                                                                                   | -3.823688 | 0.682051  | 0.422379  | C                                                                                    | 3.962503  | -0.462967 | 0.487757  |
| H                                                                                   | -4.107803 | 1.257718  | 1.302913  | H                                                                                    | 4.341402  | -0.831584 | 1.440672  |
| C                                                                                   | -3.815648 | 1.603111  | -0.782258 | C                                                                                    | 3.997055  | -1.594403 | -0.521700 |
| H                                                                                   | -3.604017 | 1.063367  | -1.704030 | H                                                                                    | 3.695759  | -1.263168 | -1.514222 |
| H                                                                                   | -4.798547 | 2.069292  | -0.873555 | H                                                                                    | 5.017006  | -1.978749 | -0.580745 |
| H                                                                                   | -3.076021 | 2.395517  | -0.653702 | H                                                                                    | 3.346535  | -2.411311 | -0.204140 |
| C                                                                                   | -4.762388 | -0.502249 | 0.287493  | C                                                                                    | 4.769931  | 0.754580  | 0.079456  |
| H                                                                                   | -4.642452 | -1.186967 | 1.128893  | H                                                                                    | 4.631941  | 1.564092  | 0.798447  |
| H                                                                                   | -5.790073 | -0.134331 | 0.296987  | H                                                                                    | 5.827749  | 0.484717  | 0.074166  |
| H                                                                                   | -4.598999 | -1.046688 | -0.641101 | H                                                                                    | 4.498501  | 1.108160  | -0.913749 |
| <b>Pc</b>                                                                           |           |           |           | <b>Rd</b>                                                                            |           |           |           |
| 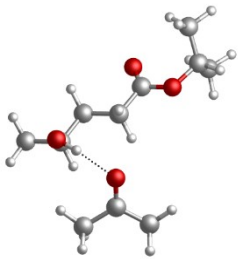 |           |           |           |  |           |           |           |
| H                                                                                   | -3.560349 | 3.002532  | -0.489526 | C                                                                                    | -2.961955 | -1.481156 | -0.137185 |
| C                                                                                   | -2.472766 | 3.051174  | -0.567142 | H                                                                                    | -3.831243 | -1.177365 | 0.451749  |
| C                                                                                   | -1.852538 | 1.725214  | -0.176363 | H                                                                                    | -2.515424 | -2.341524 | 0.366045  |
| H                                                                                   | -2.112622 | 3.841393  | 0.096534  | H                                                                                    | -3.276584 | -1.755132 | -1.142052 |
| H                                                                                   | -2.209554 | 3.314569  | -1.593038 | C                                                                                    | -1.978968 | -0.350400 | -0.183531 |
| C                                                                                   | -0.334285 | 1.752954  | -0.316800 | C                                                                                    | -1.348529 | 0.053377  | 1.126854  |
| C                                                                                   | 0.303244  | 0.426839  | 0.058865  | H                                                                                    | -0.839370 | -0.817028 | 1.546715  |
| H                                                                                   | 0.061118  | 2.551662  | 0.317887  | H                                                                                    | -2.161016 | 0.268763  | 1.826892  |
| H                                                                                   | -0.082695 | 2.002569  | -1.350713 | C                                                                                    | -0.456421 | 1.284676  | 1.029275  |
| C                                                                                   | 1.799367  | 0.419314  | -0.106895 | H                                                                                    | 0.140649  | 1.376142  | 1.940162  |
| H                                                                                   | -0.096056 | -0.389427 | -0.551783 | H                                                                                    | -1.080901 | 2.175156  | 0.978497  |

|                                                                                     |           |           |           |                                                                                      |           |           |           |
|-------------------------------------------------------------------------------------|-----------|-----------|-----------|--------------------------------------------------------------------------------------|-----------|-----------|-----------|
| H                                                                                   | 0.089404  | 0.161289  | 1.097361  | C                                                                                    | 0.497338  | 1.443173  | -0.139817 |
| O                                                                                   | 2.454371  | 1.343185  | -0.532589 | O                                                                                    | -1.694522 | 0.219822  | -1.217897 |
| O                                                                                   | 2.316248  | -0.747672 | 0.276662  | O                                                                                    | 0.602804  | 2.515361  | -0.695360 |
| O                                                                                   | -2.238577 | 1.453498  | 1.172605  | O                                                                                    | 1.311318  | 0.471100  | -0.562489 |
| C                                                                                   | -2.989031 | -1.805082 | 0.141169  | C                                                                                    | 1.431192  | -0.863904 | -0.003167 |
| O                                                                                   | -2.255666 | -1.374212 | 1.015612  | H                                                                                    | 0.443992  | -1.322482 | 0.026279  |
| H                                                                                   | -2.249864 | 0.933531  | -0.825365 | C                                                                                    | 2.283540  | -1.620734 | -0.999694 |
| H                                                                                   | -2.231646 | 0.490191  | 1.302675  | H                                                                                    | 2.397651  | -2.654886 | -0.672176 |
| C                                                                                   | -2.667728 | -3.077305 | -0.581731 | H                                                                                    | 1.816118  | -1.617147 | -1.984948 |
| H                                                                                   | -3.551440 | -3.714875 | -0.642832 | H                                                                                    | 3.273466  | -1.166814 | -1.076568 |
| H                                                                                   | -2.380169 | -2.825636 | -1.606993 | C                                                                                    | 2.063584  | -0.822666 | 1.372869  |
| H                                                                                   | -1.849035 | -3.602232 | -0.093597 | H                                                                                    | 3.031920  | -0.320091 | 1.319988  |
| C                                                                                   | -4.239822 | -1.085843 | -0.265492 | H                                                                                    | 1.443535  | -0.308703 | 2.106564  |
| H                                                                                   | -4.275664 | -0.981018 | -1.351806 | H                                                                                    | 2.221728  | -1.843341 | 1.725196  |
| H                                                                                   | -5.100868 | -1.694243 | 0.025445  |                                                                                      |           |           |           |
| H                                                                                   | -4.305130 | -0.110889 | 0.214520  |                                                                                      |           |           |           |
| C                                                                                   | 3.752742  | -0.990030 | 0.216673  |                                                                                      |           |           |           |
| H                                                                                   | 3.813872  | -2.002834 | 0.614117  |                                                                                      |           |           |           |
| C                                                                                   | 4.259158  | -0.995307 | -1.213279 |                                                                                      |           |           |           |
| H                                                                                   | 4.294296  | 0.008303  | -1.634580 |                                                                                      |           |           |           |
| H                                                                                   | 5.269472  | -1.408808 | -1.223474 |                                                                                      |           |           |           |
| H                                                                                   | 3.628694  | -1.626281 | -1.842309 |                                                                                      |           |           |           |
| C                                                                                   | 4.519902  | -0.059714 | 1.137656  |                                                                                      |           |           |           |
| H                                                                                   | 4.039330  | -0.005808 | 2.116176  |                                                                                      |           |           |           |
| H                                                                                   | 5.525696  | -0.460588 | 1.277014  |                                                                                      |           |           |           |
| H                                                                                   | 4.602737  | 0.944944  | 0.726000  |                                                                                      |           |           |           |
| TSd                                                                                 |           |           |           | Pd                                                                                   |           |           |           |
| 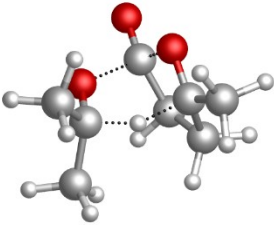 |           |           |           |  |           |           |           |
| C                                                                                   | 0.001529  | 2.597177  | -0.530639 | C                                                                                    | 1.892612  | 2.251777  | -0.429977 |
| H                                                                                   | 0.916536  | 3.175709  | -0.685823 | H                                                                                    | 2.947193  | 1.978402  | -0.498288 |
| H                                                                                   | -0.593587 | 3.086017  | 0.239191  | H                                                                                    | 1.789094  | 3.060804  | 0.295673  |



|                                                                                     |           |           |           |                                                                                      |           |           |           |
|-------------------------------------------------------------------------------------|-----------|-----------|-----------|--------------------------------------------------------------------------------------|-----------|-----------|-----------|
| H                                                                                   | -0.553367 | 2.554663  | -1.467025 | H                                                                                    | 1.552632  | 2.613403  | -1.401129 |
| C                                                                                   | 0.401947  | 1.232192  | -0.084297 | C                                                                                    | 1.077359  | 1.070672  | 0.025801  |
| C                                                                                   | 0.986366  | 0.952041  | 1.282474  | C                                                                                    | 1.498495  | 0.455222  | 1.359434  |
| H                                                                                   | 0.250498  | 1.089669  | 2.072918  | H                                                                                    | 0.989397  | 0.927347  | 2.197411  |
| H                                                                                   | 1.789863  | 1.674733  | 1.441880  | H                                                                                    | 2.576113  | 0.574889  | 1.489384  |
| C                                                                                   | 1.515592  | -0.479287 | 1.135382  | C                                                                                    | 1.144325  | -1.015871 | 1.175419  |
| H                                                                                   | 1.059368  | -1.190633 | 1.819037  | H                                                                                    | 0.110380  | -1.231995 | 1.457100  |
| H                                                                                   | 2.596610  | -0.525132 | 1.257735  | H                                                                                    | 1.797322  | -1.718646 | 1.688173  |
| C                                                                                   | 1.212227  | -0.879103 | -0.311651 | C                                                                                    | 1.242893  | -1.203736 | -0.317692 |
| O                                                                                   | 0.943190  | 0.439254  | -0.981849 | O                                                                                    | 1.237641  | -0.012544 | -0.934852 |
| O                                                                                   | 1.843334  | -1.696466 | -0.963147 | O                                                                                    | 1.328732  | -2.232123 | -0.939299 |
| O                                                                                   | -0.422675 | -1.333218 | -0.332328 | O                                                                                    | -1.684423 | -1.120290 | -0.520793 |
| C                                                                                   | -1.368339 | -0.471237 | 0.044928  | C                                                                                    | -2.216857 | -0.112477 | -0.096032 |
| H                                                                                   | -0.835979 | 0.666809  | 0.089094  | H                                                                                    | 0.013469  | 1.319856  | 0.035258  |
| C                                                                                   | -2.419549 | -0.221015 | -1.014522 | C                                                                                    | -2.594632 | 1.018369  | -1.009289 |
| H                                                                                   | -3.114439 | 0.562108  | -0.710454 | H                                                                                    | -2.423821 | 1.983824  | -0.530581 |
| H                                                                                   | -1.943334 | 0.050196  | -1.957745 | H                                                                                    | -2.047882 | 0.951729  | -1.948620 |
| H                                                                                   | -2.977730 | -1.148786 | -1.164774 | H                                                                                    | -3.667199 | 0.944159  | -1.214501 |
| C                                                                                   | -1.894122 | -0.610175 | 1.458102  | C                                                                                    | -2.527652 | 0.059764  | 1.362563  |
| H                                                                                   | -2.555240 | -1.481104 | 1.476878  | H                                                                                    | -3.535056 | 0.460073  | 1.492315  |
| H                                                                                   | -1.092490 | -0.780537 | 2.174742  | H                                                                                    | -2.421431 | -0.883625 | 1.894894  |
| H                                                                                   | -2.471406 | 0.266174  | 1.754289  | H                                                                                    | -1.835071 | 0.797116  | 1.781091  |
| R3                                                                                  |           |           |           | TS3                                                                                  |           |           |           |
| 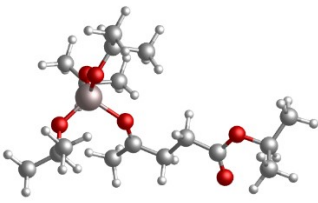 |           |           |           |  |           |           |           |
| C                                                                                   | -1.049832 | -2.321235 | -1.459005 | C                                                                                    | -1.101171 | -2.696884 | -1.045402 |
| H                                                                                   | -1.091953 | -2.044944 | -2.519442 | H                                                                                    | -1.140322 | -2.628336 | -2.135888 |
| H                                                                                   | -2.050178 | -2.257165 | -1.034594 | H                                                                                    | -2.118910 | -2.615193 | -0.659318 |
| H                                                                                   | -0.659004 | -3.336991 | -1.402050 | H                                                                                    | -0.675115 | -3.661595 | -0.769846 |
| C                                                                                   | -0.116528 | -1.371313 | -0.805716 | C                                                                                    | -0.250597 | -1.558107 | -0.546307 |
| C                                                                                   | 1.345085  | -1.608448 | -0.938959 | C                                                                                    | 1.231735  | -1.682881 | -0.835995 |
| H                                                                                   | 1.547085  | -1.827484 | -1.991991 | H                                                                                    | 1.316828  | -1.805137 | -1.921579 |

|   |           |           |           |   |           |           |           |
|---|-----------|-----------|-----------|---|-----------|-----------|-----------|
| H | 1.549910  | -2.544861 | -0.406714 | H | 1.607543  | -2.603098 | -0.385770 |
| C | 2.198849  | -0.473126 | -0.415081 | C | 2.038921  | -0.480433 | -0.386648 |
| H | 1.986598  | -0.272281 | 0.637537  | H | 1.958935  | -0.321211 | 0.691157  |
| H | 2.000572  | 0.455140  | -0.955225 | H | 1.682316  | 0.435113  | -0.862089 |
| C | 3.667155  | -0.779492 | -0.531336 | C | 3.500574  | -0.630025 | -0.706323 |
| O | -0.513212 | -0.380077 | -0.178396 | O | -0.761813 | -0.351099 | -0.665609 |
| O | 4.125894  | -1.824077 | -0.933758 | O | 4.003311  | -1.603710 | -1.219478 |
| O | 4.408247  | 0.250967  | -0.133238 | O | 4.188733  | 0.454774  | -0.353119 |
| C | 5.856892  | 0.103260  | -0.143445 | C | 5.628047  | 0.458071  | -0.567469 |
| H | 6.122265  | -0.463214 | -1.036506 | H | 5.819159  | -0.032474 | -1.522675 |
| C | 6.414988  | 1.506033  | -0.222020 | C | 6.032842  | 1.913096  | -0.631712 |
| H | 7.504635  | 1.462810  | -0.254617 | H | 7.106332  | 1.985313  | -0.812491 |
| H | 6.062677  | 2.015098  | -1.119857 | H | 5.511575  | 2.426722  | -1.440460 |
| H | 6.118320  | 2.086672  | 0.653941  | H | 5.806603  | 2.416606  | 0.310504  |
| C | 6.291777  | -0.637754 | 1.104534  | C | 6.302351  | -0.295955 | 0.560724  |
| H | 6.010524  | -0.071999 | 1.995367  | H | 6.095971  | 0.191704  | 1.515954  |
| H | 5.840749  | -1.629154 | 1.157065  | H | 5.957941  | -1.329537 | 0.607324  |
| H | 7.376565  | -0.756882 | 1.098850  | H | 7.381933  | -0.301708 | 0.401891  |
| C | -1.099915 | 3.547939  | 2.587183  | C | -1.126217 | 4.229432  | 1.406264  |
| H | -0.807695 | 4.588838  | 2.433217  | H | -1.305000 | 5.233863  | 1.016882  |
| H | -0.301879 | 3.040407  | 3.136220  | H | -0.047664 | 4.086520  | 1.515728  |
| H | -2.003748 | 3.530991  | 3.199248  | H | -1.585586 | 4.153770  | 2.393754  |
| C | -1.341540 | 2.848890  | 1.260491  | C | -1.695749 | 3.174621  | 0.473592  |
| H | -2.133720 | 3.385620  | 0.721741  | H | -2.775988 | 3.344556  | 0.371306  |
| C | -0.086581 | 2.855262  | 0.397657  | C | -1.063363 | 3.254910  | -0.909158 |
| H | 0.718546  | 2.314678  | 0.902928  | H | 0.012615  | 3.073180  | -0.839526 |
| H | -0.273750 | 2.379650  | -0.569121 | H | -1.496738 | 2.508730  | -1.582418 |
| H | 0.248186  | 3.877600  | 0.207788  | H | -1.220740 | 4.238577  | -1.357350 |
| O | -1.772483 | 1.523471  | 1.520520  | O | -1.476799 | 1.896297  | 1.046737  |
| C | -4.424599 | 1.037368  | -2.904237 | C | -5.793961 | -0.139813 | -0.935122 |
| H | -4.650038 | 0.597310  | -3.878133 | H | -6.384020 | -0.899879 | -1.451603 |
| H | -4.353176 | 2.122087  | -3.021566 | H | -6.003262 | 0.832076  | -1.390260 |
| H | -5.250750 | 0.817337  | -2.225458 | H | -6.110201 | -0.107317 | 0.109191  |
| C | -3.120121 | 0.489251  | -2.350520 | C | -4.309245 | -0.445316 | -1.031750 |
| H | -3.228777 | -0.598735 | -2.240370 | H | -4.128393 | -1.425484 | -0.567520 |

|                                                                                     |           |           |           |                                                                                      |           |           |           |
|-------------------------------------------------------------------------------------|-----------|-----------|-----------|--------------------------------------------------------------------------------------|-----------|-----------|-----------|
| C                                                                                   | -1.958547 | 0.770911  | -3.292834 | C                                                                                    | -3.844575 | -0.501876 | -2.479615 |
| H                                                                                   | -1.857788 | 1.848961  | -3.445932 | H                                                                                    | -4.033163 | 0.457740  | -2.969046 |
| H                                                                                   | -1.017565 | 0.399131  | -2.880209 | H                                                                                    | -2.773205 | -0.706826 | -2.533213 |
| H                                                                                   | -2.115447 | 0.296525  | -4.264400 | H                                                                                    | -4.371776 | -1.284091 | -3.030927 |
| O                                                                                   | -2.866114 | 1.077772  | -1.087923 | O                                                                                    | -3.590699 | 0.552492  | -0.326883 |
| C                                                                                   | -2.086437 | -1.528074 | 3.068204  | C                                                                                    | 0.170139  | -0.941654 | 2.678647  |
| H                                                                                   | -1.771913 | -2.339868 | 3.727957  | H                                                                                    | 1.089131  | -1.525408 | 2.722255  |
| H                                                                                   | -2.859709 | -0.945722 | 3.576065  | H                                                                                    | -0.214370 | -0.809692 | 3.694339  |
| H                                                                                   | -1.224340 | -0.878407 | 2.896106  | H                                                                                    | 0.369269  | 0.046189  | 2.260642  |
| C                                                                                   | -2.623916 | -2.079213 | 1.755438  | C                                                                                    | -0.900362 | -1.650881 | 1.884948  |
| H                                                                                   | -1.809375 | -2.628992 | 1.259558  | H                                                                                    | -0.254869 | -1.822082 | 0.747212  |
| C                                                                                   | -3.774657 | -3.044038 | 1.982819  | C                                                                                    | -1.173841 | -3.084187 | 2.254249  |
| H                                                                                   | -4.593830 | -2.533343 | 2.496055  | H                                                                                    | -1.600478 | -3.089031 | 3.261539  |
| H                                                                                   | -4.149047 | -3.421854 | 1.029076  | H                                                                                    | -1.898043 | -3.527164 | 1.571345  |
| H                                                                                   | -3.459534 | -3.894277 | 2.591153  | H                                                                                    | -0.256690 | -3.672319 | 2.263327  |
| O                                                                                   | -3.067553 | -1.037478 | 0.905446  | O                                                                                    | -1.971127 | -0.934169 | 1.598204  |
| Al                                                                                  | -2.191853 | 0.341952  | 0.325083  | Al                                                                                   | -2.025203 | 0.391350  | 0.387791  |
| P3                                                                                  |           |           |           | R4                                                                                   |           |           |           |
| 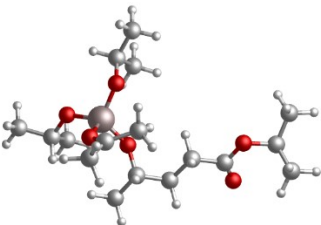 |           |           |           |  |           |           |           |
| C                                                                                   | -0.913485 | -3.073435 | -0.655874 | C                                                                                    | 0.703482  | 1.233657  | -1.548378 |
| H                                                                                   | -0.982005 | -3.045630 | -1.746368 | H                                                                                    | 1.512189  | 1.148427  | -2.276743 |
| H                                                                                   | -1.925319 | -3.041473 | -0.244986 | H                                                                                    | 0.742283  | 2.229257  | -1.097628 |
| H                                                                                   | -0.454668 | -4.019593 | -0.359994 | H                                                                                    | -0.238170 | 1.136472  | -2.094672 |
| C                                                                                   | -0.099750 | -1.893189 | -0.149845 | C                                                                                    | 0.804773  | 0.164345  | -0.468955 |
| C                                                                                   | 1.323037  | -1.923844 | -0.697437 | C                                                                                    | 2.086027  | 0.279401  | 0.350195  |
| H                                                                                   | 1.277818  | -1.844123 | -1.787838 | H                                                                                    | 2.054601  | -0.483938 | 1.130944  |
| H                                                                                   | 1.780804  | -2.886551 | -0.456828 | H                                                                                    | 2.097980  | 1.252817  | 0.849049  |
| C                                                                                   | 2.163485  | -0.795460 | -0.127588 | C                                                                                    | 3.343606  | 0.099432  | -0.484514 |
| H                                                                                   | 2.225837  | -0.865780 | 0.963148  | H                                                                                    | 3.486257  | 0.924959  | -1.187014 |
| H                                                                                   | 1.713556  | 0.176351  | -0.347445 | H                                                                                    | 3.292015  | -0.811815 | -1.087177 |
| C                                                                                   | 3.572455  | -0.772870 | -0.648375 | C                                                                                    | 4.594220  | 0.026069  | 0.347418  |

|   |           |           |           |   |           |           |           |
|---|-----------|-----------|-----------|---|-----------|-----------|-----------|
| O | -0.706494 | -0.675729 | -0.515762 | O | -0.288703 | 0.247828  | 0.424859  |
| O | 4.037903  | -1.559991 | -1.441432 | O | 4.649390  | 0.213690  | 1.541397  |
| O | 4.269427  | 0.238902  | -0.125655 | O | 5.661139  | -0.273276 | -0.397274 |
| C | 5.666420  | 0.382490  | -0.500701 | C | 6.957829  | -0.351508 | 0.256407  |
| H | 5.747004  | 0.157970  | -1.564921 | H | 6.807413  | -0.816913 | 1.230858  |
| C | 6.016774  | 1.829646  | -0.237367 | C | 7.811255  | -1.236889 | -0.623498 |
| H | 7.059386  | 2.008954  | -0.503839 | H | 8.796178  | -1.361967 | -0.171557 |
| H | 5.388678  | 2.495232  | -0.830823 | H | 7.357194  | -2.221771 | -0.739061 |
| H | 5.883854  | 2.067404  | 0.820243  | H | 7.938125  | -0.788572 | -1.611005 |
| C | 6.503872  | -0.585095 | 0.310761  | C | 7.523645  | 1.044910  | 0.418828  |
| H | 6.393117  | -0.374681 | 1.376856  | H | 7.644036  | 1.518920  | -0.557748 |
| H | 6.211894  | -1.618285 | 0.120363  | H | 6.875254  | 1.666882  | 1.036650  |
| H | 7.556205  | -0.472315 | 0.044602  | H | 8.502326  | 0.989371  | 0.898246  |
| C | -1.224328 | 4.303091  | 0.125702  | H | 0.800712  | -0.820265 | -0.958245 |
| H | -1.419473 | 5.146809  | -0.539509 | C | -2.252749 | -2.597941 | 1.910990  |
| H | -0.144912 | 4.226766  | 0.283733  | H | -2.600080 | -3.569673 | 2.268998  |
| H | -1.699383 | 4.505813  | 1.087607  | H | -1.448016 | -2.253474 | 2.566043  |
| C | -1.755171 | 3.008708  | -0.465397 | H | -1.843126 | -2.741790 | 0.906058  |
| H | -2.836430 | 3.115683  | -0.626890 | C | -3.388836 | -1.583764 | 1.900084  |
| C | -1.100383 | 2.698621  | -1.805279 | H | -4.179801 | -1.957319 | 1.233894  |
| H | -0.022269 | 2.568919  | -1.675657 | C | -3.980418 | -1.396225 | 3.286376  |
| H | -1.508004 | 1.779107  | -2.237753 | H | -3.210282 | -1.041896 | 3.976610  |
| H | -1.271188 | 3.505299  | -2.521630 | H | -4.784380 | -0.657993 | 3.259856  |
| O | -1.525073 | 1.958041  | 0.459177  | H | -4.385689 | -2.334910 | 3.669683  |
| C | -5.643935 | -0.743899 | -1.155233 | O | -2.945624 | -0.326909 | 1.420465  |
| H | -6.139482 | -1.597682 | -1.622461 | C | -4.536688 | -1.005687 | -1.710651 |
| H | -5.919683 | 0.159987  | -1.705183 | H | -5.410976 | -1.616523 | -1.946015 |
| H | -6.011651 | -0.649123 | -0.131731 | H | -4.447811 | -0.224402 | -2.471808 |
| C | -4.134727 | -0.915924 | -1.167325 | H | -4.711581 | -0.528922 | -0.741642 |
| H | -3.888811 | -1.830624 | -0.609854 | C | -3.272839 | -1.855269 | -1.682401 |
| C | -3.602834 | -1.057939 | -2.585978 | H | -3.396063 | -2.630929 | -0.913372 |
| H | -3.863366 | -0.171642 | -3.171435 | C | -3.034029 | -2.539163 | -3.016728 |
| H | -2.515554 | -1.159044 | -2.579254 | H | -2.922887 | -1.791111 | -3.806280 |
| H | -4.027264 | -1.935934 | -3.078808 | H | -2.122122 | -3.138000 | -2.979456 |
| O | -3.542905 | 0.203284  | -0.531466 | H | -3.867960 | -3.195234 | -3.274463 |

|                                                                                    |           |           |           |                                                                                     |           |           |           |
|------------------------------------------------------------------------------------|-----------|-----------|-----------|-------------------------------------------------------------------------------------|-----------|-----------|-----------|
| C                                                                                  | -0.074646 | 0.285016  | 2.839752  | O                                                                                   | -2.137011 | -1.067900 | -1.365587 |
| H                                                                                  | 0.645924  | -0.254071 | 3.454421  | Al                                                                                  | -1.951699 | -0.044873 | 0.026380  |
| H                                                                                  | -0.209727 | 1.278212  | 3.284060  | C                                                                                   | -2.722900 | 4.001652  | -0.305836 |
| H                                                                                  | 0.287096  | 0.406004  | 1.819828  | H                                                                                   | -3.044540 | 4.812505  | 0.348907  |
| C                                                                                  | -1.395557 | -0.387220 | 2.885666  | H                                                                                   | -3.190354 | 4.143905  | -1.283332 |
| H                                                                                  | -0.036198 | -1.966142 | 0.947933  | H                                                                                   | -1.639810 | 4.053184  | -0.418016 |
| C                                                                                  | -1.819483 | -1.059127 | 4.133723  | C                                                                                   | -3.139449 | 2.677369  | 0.290024  |
| H                                                                                  | -1.543390 | -0.453102 | 4.997843  | H                                                                                   | -2.630142 | 2.506228  | 1.238801  |
| H                                                                                  | -2.884148 | -1.278112 | 4.121629  | C                                                                                   | -4.634181 | 2.523308  | 0.451920  |
| H                                                                                  | -1.251966 | -1.994016 | 4.204070  | H                                                                                   | -5.134561 | 2.625328  | -0.514564 |
| O                                                                                  | -2.157891 | -0.395649 | 1.906326  | H                                                                                   | -4.877878 | 1.551980  | 0.882317  |
| Al                                                                                 | -1.962038 | 0.300856  | 0.170164  | H                                                                                   | -5.010315 | 3.302897  | 1.116136  |
|                                                                                    |           |           |           | O                                                                                   | -2.635169 | 1.602920  | -0.573947 |
|                                                                                    |           |           |           | H                                                                                   | -3.046607 | 1.634634  | -1.453167 |
| TS4                                                                                |           |           |           | P4                                                                                  |           |           |           |
| 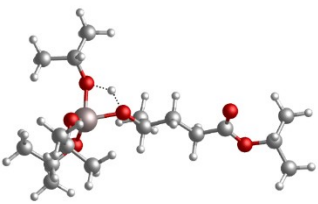 |           |           |           |  |           |           |           |
| C                                                                                  | 0.675844  | 0.631874  | -2.100205 | C                                                                                   | 0.529750  | 1.646124  | -1.906064 |
| H                                                                                  | 1.452759  | 0.200557  | -2.732891 | H                                                                                   | 1.298844  | 1.338782  | -2.615687 |
| H                                                                                  | 0.827997  | 1.713757  | -2.050716 | H                                                                                   | 0.703441  | 2.690747  | -1.635793 |
| H                                                                                  | -0.287781 | 0.434385  | -2.574484 | H                                                                                   | -0.439119 | 1.559719  | -2.399462 |
| C                                                                                  | 0.715177  | 0.030024  | -0.707438 | C                                                                                   | 0.571056  | 0.764642  | -0.679291 |
| C                                                                                  | 1.975002  | 0.380116  | 0.069755  | C                                                                                   | 1.825265  | 0.895322  | 0.164817  |
| H                                                                                  | 1.882295  | -0.036390 | 1.075295  | H                                                                                   | 1.709255  | 0.271934  | 1.053545  |
| H                                                                                  | 2.032694  | 1.467666  | 0.170286  | H                                                                                   | 1.929092  | 1.931869  | 0.498275  |
| C                                                                                  | 3.236254  | -0.153206 | -0.589178 | C                                                                                   | 3.065411  | 0.465884  | -0.603173 |
| H                                                                                  | 3.417142  | 0.321940  | -1.557568 | H                                                                                   | 3.285194  | 1.146685  | -1.429859 |
| H                                                                                  | 3.163819  | -1.227358 | -0.780072 | H                                                                                   | 2.937616  | -0.527281 | -1.041618 |
| C                                                                                  | 4.467044  | 0.089873  | 0.240944  | C                                                                                   | 4.291558  | 0.434946  | 0.268043  |
| O                                                                                  | -0.405031 | 0.497557  | 0.056478  | O                                                                                   | -0.572915 | 1.081605  | 0.177491  |
| O                                                                                  | 4.506107  | 0.769057  | 1.241578  | O                                                                                   | 4.344039  | 0.844905  | 1.404841  |
| O                                                                                  | 5.532099  | -0.531145 | -0.268235 | O                                                                                   | 5.331349  | -0.099434 | -0.371636 |

|    |           |           |           |    |           |           |           |
|----|-----------|-----------|-----------|----|-----------|-----------|-----------|
| C  | 6.817198  | -0.341315 | 0.386743  | C  | 6.610660  | -0.153348 | 0.320526  |
| H  | 6.638427  | -0.321951 | 1.462075  | H  | 6.409722  | -0.405313 | 1.362089  |
| C  | 7.657168  | -1.541944 | 0.013888  | C  | 7.397179  | -1.257894 | -0.348184 |
| H  | 8.632834  | -1.466911 | 0.496542  | H  | 8.365601  | -1.364521 | 0.142490  |
| H  | 7.180497  | -2.467033 | 0.340361  | H  | 6.867762  | -2.208745 | -0.277776 |
| H  | 7.808375  | -1.583334 | -1.066700 | H  | 7.566847  | -1.024315 | -1.401195 |
| C  | 7.421301  | 0.969352  | -0.074613 | C  | 7.288032  | 1.198304  | 0.222865  |
| H  | 7.575119  | 0.952513  | -1.155800 | H  | 7.478720  | 1.448972  | -0.822882 |
| H  | 6.779171  | 1.813502  | 0.178755  | H  | 6.676256  | 1.982332  | 0.669903  |
| H  | 8.388289  | 1.118471  | 0.408770  | H  | 8.242803  | 1.167610  | 0.750180  |
| H  | 0.622299  | -1.058809 | -0.776621 | H  | 0.408556  | -0.277491 | -0.954853 |
| C  | -1.880079 | -2.392889 | 1.970847  | C  | -0.515700 | -1.922781 | 1.778991  |
| H  | -2.024590 | -3.377131 | 2.421431  | H  | -0.107260 | -2.888686 | 2.084232  |
| H  | -1.054972 | -1.892933 | 2.485855  | H  | -0.104160 | -1.149278 | 2.432861  |
| H  | -1.594643 | -2.549628 | 0.924657  | H  | -0.179803 | -1.728471 | 0.755746  |
| C  | -3.145352 | -1.552896 | 2.076163  | C  | -2.036101 | -1.925506 | 1.863598  |
| H  | -3.954048 | -2.069515 | 1.541484  | H  | -2.418051 | -2.701857 | 1.186505  |
| C  | -3.567060 | -1.357589 | 3.520951  | C  | -2.511286 | -2.246192 | 3.270760  |
| H  | -2.776301 | -0.842632 | 4.072880  | H  | -2.131998 | -1.499861 | 3.973919  |
| H  | -4.475724 | -0.754823 | 3.574984  | H  | -3.602019 | -2.237011 | 3.314150  |
| H  | -3.759944 | -2.317807 | 4.003530  | H  | -2.161914 | -3.231067 | 3.587735  |
| O  | -2.949132 | -0.275347 | 1.486102  | O  | -2.568208 | -0.672264 | 1.480750  |
| C  | -4.858050 | -1.319071 | -1.314180 | C  | -3.654935 | -2.437102 | -1.492799 |
| H  | -5.662027 | -2.050482 | -1.422503 | H  | -3.717471 | -3.514663 | -1.661067 |
| H  | -4.994053 | -0.539499 | -2.068852 | H  | -4.327384 | -1.935714 | -2.194242 |
| H  | -4.950700 | -0.864249 | -0.323635 | H  | -4.000078 | -2.229205 | -0.476785 |
| C  | -3.498547 | -1.979673 | -1.486538 | C  | -2.232221 | -1.935340 | -1.690523 |
| H  | -3.380684 | -2.745543 | -0.707881 | H  | -1.576637 | -2.466444 | -0.985907 |
| C  | -3.369969 | -2.647209 | -2.843565 | C  | -1.736548 | -2.209879 | -3.100376 |
| H  | -3.494923 | -1.906156 | -3.637450 | H  | -2.376096 | -1.700118 | -3.825799 |
| H  | -2.385639 | -3.106685 | -2.952262 | H  | -0.715507 | -1.842751 | -3.225392 |
| H  | -4.128271 | -3.422628 | -2.969323 | H  | -1.747749 | -3.279811 | -3.318242 |
| O  | -2.454617 | -1.024894 | -1.353879 | O  | -2.158244 | -0.541993 | -1.447550 |
| Al | -2.179091 | 0.032766  | -0.024339 | Al | -2.280830 | 0.292406  | 0.068182  |
| C  | -2.298501 | 4.209663  | -0.099681 | C  | -4.972411 | 3.329272  | 0.457778  |

|   |           |          |           |   |           |           |           |
|---|-----------|----------|-----------|---|-----------|-----------|-----------|
| H | -2.776872 | 5.026752 | 0.443207  | H | -5.993467 | 3.464282  | 0.820473  |
| H | -2.473558 | 4.352115 | -1.168766 | H | -4.925901 | 3.667892  | -0.580699 |
| H | -1.224118 | 4.254627 | 0.088392  | H | -4.309656 | 3.957669  | 1.055915  |
| C | -2.864965 | 2.878281 | 0.348436  | C | -4.550917 | 1.873141  | 0.548889  |
| H | -2.678805 | 2.739669 | 1.418578  | H | -4.619153 | 1.555415  | 1.598025  |
| C | -4.350042 | 2.751500 | 0.074774  | C | -5.459921 | 0.977943  | -0.281974 |
| H | -4.546017 | 2.852759 | -0.995425 | H | -5.402484 | 1.258710  | -1.337138 |
| H | -4.724336 | 1.781560 | 0.411048  | H | -5.165781 | -0.071463 | -0.187611 |
| H | -4.900731 | 3.530244 | 0.605272  | H | -6.498459 | 1.062995  | 0.045472  |
| O | -2.183156 | 1.831570 | -0.362684 | O | -3.205292 | 1.761483  | 0.117773  |
| H | -0.989501 | 1.551293 | -0.183549 | H | -0.527834 | 1.997544  | 0.497489  |

### 3. The structures of reactants, TS and products in Ring-closure step

**Table S 3** The snapshots and coordinates of of reactants, TS and products optimized at M06-2X-D3/def2-tzvp SMD=2-propanol level in the ring-closure.

| Re |           |           |           | TSe |           |           |           |
|----|-----------|-----------|-----------|-----|-----------|-----------|-----------|
|    |           |           |           |     |           |           |           |
| C  | 3.897402  | 0.646184  | -0.378694 | C   | -3.295539 | 1.301899  | 0.307860  |
| H  | 3.861001  | 0.276302  | -1.405952 | H   | -3.477605 | 0.876550  | 1.297152  |
| H  | 4.674895  | 0.102012  | 0.161678  | H   | -4.199680 | 1.184810  | -0.293420 |
| H  | 4.175095  | 1.702493  | -0.398849 | H   | -3.089811 | 2.367723  | 0.416420  |
| C  | 2.549089  | 0.460592  | 0.291446  | C   | -2.136485 | 0.591384  | -0.352882 |
| C  | 2.123654  | -0.996739 | 0.330673  | C   | -2.347082 | -0.911926 | -0.528322 |
| H  | 2.850314  | -1.552024 | 0.925952  | H   | -3.002954 | -1.134193 | -1.369399 |
| H  | 2.143138  | -1.409637 | -0.681989 | H   | -2.792621 | -1.322264 | 0.382279  |
| C  | 0.733244  | -1.179140 | 0.934639  | C   | -0.942786 | -1.475285 | -0.720298 |
| H  | 0.632350  | -0.617648 | 1.863669  | H   | -0.564121 | -1.238317 | -1.714218 |
| H  | 0.561241  | -2.235197 | 1.160638  | H   | -0.882755 | -2.549585 | -0.555605 |
| C  | -0.362186 | -0.781544 | -0.018760 | C   | -0.092222 | -0.790640 | 0.331014  |
| O  | -0.427455 | -1.154916 | -1.168987 | O   | 0.285811  | -1.240760 | 1.382183  |
| O  | -1.287701 | -0.011575 | 0.554267  | O   | 0.973904  | 0.175450  | -0.443554 |

|                                                                                    |           |           |           |                                                                                     |           |           |           |
|------------------------------------------------------------------------------------|-----------|-----------|-----------|-------------------------------------------------------------------------------------|-----------|-----------|-----------|
| C                                                                                  | -2.424399 | 0.404900  | -0.250307 | C                                                                                   | 2.258845  | 0.353597  | 0.195295  |
| H                                                                                  | -2.056344 | 0.610902  | -1.256142 | H                                                                                   | 2.095039  | 0.361172  | 1.275209  |
| C                                                                                  | -3.452041 | -0.708221 | -0.277482 | C                                                                                   | 3.145515  | -0.811344 | -0.190776 |
| H                                                                                  | -4.311420 | -0.401742 | -0.876302 | H                                                                                   | 4.112457  | -0.721657 | 0.307309  |
| H                                                                                  | -3.038969 | -1.618832 | -0.712327 | H                                                                                   | 2.694582  | -1.759708 | 0.104745  |
| H                                                                                  | -3.797177 | -0.924574 | 0.736041  | H                                                                                   | 3.310195  | -0.818828 | -1.270605 |
| C                                                                                  | -2.943143 | 1.671753  | 0.391269  | C                                                                                   | 2.807609  | 1.691198  | -0.255783 |
| H                                                                                  | -3.270892 | 1.476108  | 1.414452  | H                                                                                   | 2.941363  | 1.704431  | -1.339460 |
| H                                                                                  | -2.170059 | 2.441297  | 0.408984  | H                                                                                   | 2.137747  | 2.504809  | 0.027917  |
| H                                                                                  | -3.793855 | 2.048633  | -0.178489 | H                                                                                   | 3.776891  | 1.865480  | 0.214241  |
| O                                                                                  | 1.526021  | 1.171652  | -0.414891 | O                                                                                   | -0.965653 | 0.694688  | 0.468663  |
| H                                                                                  | 1.728844  | 2.114213  | -0.380908 | H                                                                                   | 0.121314  | 0.908259  | -0.129655 |
| H                                                                                  | 2.595202  | 0.839700  | 1.319730  | H                                                                                   | -1.919664 | 1.042985  | -1.327898 |
| Pe                                                                                 |           |           |           | Rf                                                                                  |           |           |           |
| 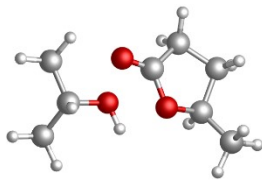 |           |           |           |  |           |           |           |
| C                                                                                  | 3.126374  | 1.608411  | -0.341029 | C                                                                                   | 3.052973  | -2.531857 | -0.615166 |
| H                                                                                  | 3.744888  | 1.016413  | -1.018322 | H                                                                                   | 2.578988  | -3.350076 | -1.163295 |
| H                                                                                  | 3.755519  | 1.976777  | 0.471434  | H                                                                                   | 3.626525  | -2.956779 | 0.210669  |
| H                                                                                  | 2.724434  | 2.466322  | -0.881303 | H                                                                                   | 3.741295  | -2.017751 | -1.288097 |
| C                                                                                  | 2.021726  | 0.761552  | 0.232951  | C                                                                                   | 1.996727  | -1.574663 | -0.101302 |
| C                                                                                  | 2.472178  | -0.497400 | 0.970292  | C                                                                                   | 1.065513  | -2.252445 | 0.899579  |
| H                                                                                  | 2.667696  | -0.297131 | 2.021573  | H                                                                                   | 1.656004  | -2.563260 | 1.764087  |
| H                                                                                  | 3.383001  | -0.884049 | 0.508153  | H                                                                                   | 0.640730  | -3.155190 | 0.451326  |
| C                                                                                  | 1.307835  | -1.452161 | 0.734115  | C                                                                                   | -0.057662 | -1.334305 | 1.371493  |
| H                                                                                  | 0.520618  | -1.332320 | 1.482598  | H                                                                                   | 0.318814  | -0.335986 | 1.600350  |
| H                                                                                  | 1.573925  | -2.505084 | 0.672042  | H                                                                                   | -0.503606 | -1.730619 | 2.288827  |
| C                                                                                  | 0.746645  | -0.975810 | -0.582011 | C                                                                                   | -1.198885 | -1.237277 | 0.394217  |
| O                                                                                  | 0.016506  | -1.562432 | -1.341175 | O                                                                                   | -1.693458 | -2.180645 | -0.176751 |
| O                                                                                  | -1.360386 | 0.598942  | 0.825308  | O                                                                                   | -1.657855 | 0.015085  | 0.266807  |
| C                                                                                  | -2.409542 | 0.304672  | -0.108123 | C                                                                                   | -2.847496 | 0.235606  | -0.545790 |
| H                                                                                  | -1.967211 | 0.178638  | -1.102323 | H                                                                                   | -2.778479 | -0.422402 | -1.412046 |



|                                                                                     |           |           |           |                                                                                      |           |           |           |
|-------------------------------------------------------------------------------------|-----------|-----------|-----------|--------------------------------------------------------------------------------------|-----------|-----------|-----------|
| C                                                                                   | -3.026657 | -1.004952 | 0.333911  | C                                                                                    | -4.074200 | -0.094611 | 0.279384  |
| H                                                                                   | -3.806619 | -1.313329 | -0.364200 | H                                                                                    | -4.972568 | 0.072298  | -0.317284 |
| H                                                                                   | -2.271747 | -1.792195 | 0.375267  | H                                                                                    | -4.066112 | -1.136582 | 0.601056  |
| H                                                                                   | -3.472921 | -0.895882 | 1.325771  | H                                                                                    | -4.119611 | 0.548529  | 1.161094  |
| C                                                                                   | -3.419983 | 1.436853  | -0.146061 | C                                                                                    | -2.794792 | 1.684123  | -0.975410 |
| H                                                                                   | -3.876225 | 1.570642  | 0.838043  | H                                                                                    | -2.788847 | 2.343295  | -0.104072 |
| H                                                                                   | -2.939751 | 2.374172  | -0.437077 | H                                                                                    | -1.906361 | 1.882662  | -1.576582 |
| H                                                                                   | -4.209915 | 1.223840  | -0.869127 | H                                                                                    | -3.674546 | 1.917488  | -1.576810 |
| O                                                                                   | 1.199484  | 0.255870  | -0.860465 | O                                                                                    | 1.265609  | -1.074612 | -1.222485 |
| H                                                                                   | -0.944245 | 1.427811  | 0.557398  | H                                                                                    | 1.034025  | -0.143785 | -1.041714 |
| H                                                                                   | 1.362263  | 1.359340  | 0.866455  | H                                                                                    | 2.485162  | -0.730057 | 0.401907  |
|                                                                                     |           |           |           | C                                                                                    | 2.935450  | 2.254092  | -0.391699 |
|                                                                                     |           |           |           | H                                                                                    | 3.734000  | 2.671776  | 0.223146  |
|                                                                                     |           |           |           | H                                                                                    | 2.771924  | 2.915388  | -1.246200 |
|                                                                                     |           |           |           | H                                                                                    | 3.259022  | 1.279401  | -0.763517 |
|                                                                                     |           |           |           | C                                                                                    | 1.661927  | 2.124232  | 0.414807  |
|                                                                                     |           |           |           | H                                                                                    | 1.833201  | 1.445800  | 1.258790  |
|                                                                                     |           |           |           | C                                                                                    | 1.157559  | 3.456589  | 0.936020  |
|                                                                                     |           |           |           | H                                                                                    | 0.988498  | 4.148301  | 0.107356  |
|                                                                                     |           |           |           | H                                                                                    | 0.217364  | 3.326892  | 1.477636  |
|                                                                                     |           |           |           | H                                                                                    | 1.884526  | 3.899596  | 1.619512  |
|                                                                                     |           |           |           | O                                                                                    | 0.685321  | 1.531435  | -0.455676 |
|                                                                                     |           |           |           | H                                                                                    | -0.139557 | 1.384053  | 0.031906  |
| TSf                                                                                 |           |           |           | Pf                                                                                   |           |           |           |
| 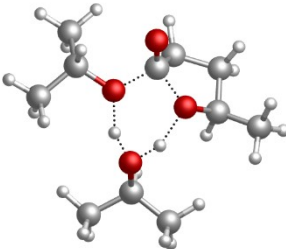 |           |           |           |  |           |           |           |
| C                                                                                   | 3.056291  | -1.855381 | -0.449599 | C                                                                                    | -3.719541 | -0.208205 | 0.116095  |
| H                                                                                   | 2.829497  | -2.592247 | -1.222899 | H                                                                                    | -4.130754 | -0.999723 | 0.745352  |
| H                                                                                   | 3.764404  | -2.293972 | 0.256951  | H                                                                                    | -4.366516 | -0.084074 | -0.754597 |
| H                                                                                   | 3.532827  | -0.992409 | -0.918383 | H                                                                                    | -3.717315 | 0.725060  | 0.679531  |
| C                                                                                   | 1.791738  | -1.456135 | 0.273047  | C                                                                                    | -2.335887 | -0.580885 | -0.347152 |
| C                                                                                   | 1.019816  | -2.603834 | 0.909153  | C                                                                                    | -2.238419 | -1.923353 | -1.070124 |

|    |           |           |           |     |           |           |           |
|----|-----------|-----------|-----------|-----|-----------|-----------|-----------|
| H  | 1.445641  | -2.896845 | 1.868240  | H   | -2.385425 | -1.811311 | -2.142172 |
| H  | 1.032056  | -3.468535 | 0.239998  | H   | -2.998267 | -2.601994 | -0.677346 |
| C  | -0.386057 | -2.029973 | 1.017445  | C   | -0.844803 | -2.410221 | -0.691391 |
| H  | -0.439438 | -1.315166 | 1.840323  | H   | -0.076631 | -2.011692 | -1.359199 |
| H  | -1.159428 | -2.785341 | 1.144467  | H   | -0.728464 | -3.489640 | -0.625336 |
| C  | -0.587096 | -1.312262 | -0.327523 | C   | -0.619449 | -1.772560 | 0.654676  |
| O  | -1.144095 | -1.902530 | -1.284268 | O   | 0.161800  | -2.077748 | 1.517103  |
| O  | -1.187416 | 0.079410  | -0.040470 | O   | 1.600716  | -0.127647 | -0.511583 |
| C  | -2.593615 | 0.221455  | -0.305649 | C   | 2.746519  | -0.690804 | 0.132730  |
| H  | -2.789741 | -0.197983 | -1.293853 | H   | 2.477285  | -0.956206 | 1.160983  |
| C  | -3.399954 | -0.525305 | 0.740060  | C   | 3.107192  | -1.953281 | -0.621978 |
| H  | -4.466904 | -0.390085 | 0.551639  | H   | 3.981522  | -2.431373 | -0.176884 |
| H  | -3.186138 | -1.594639 | 0.714427  | H   | 2.277787  | -2.663340 | -0.599550 |
| H  | -3.173572 | -0.144040 | 1.739133  | H   | 3.335762  | -1.716748 | -1.664768 |
| C  | -2.892684 | 1.708275  | -0.308284 | C   | 3.884951  | 0.315697  | 0.158697  |
| H  | -2.682501 | 2.144641  | 0.671472  | H   | 4.159953  | 0.599816  | -0.860509 |
| H  | -2.296858 | 2.225887  | -1.063327 | H   | 3.589718  | 1.216222  | 0.702496  |
| H  | -3.946555 | 1.874147  | -0.537074 | H   | 4.763806  | -0.104888 | 0.652363  |
| O  | 0.860701  | -0.887364 | -0.667819 | O   | -1.474974 | -0.743257 | 0.822835  |
| H  | 0.977126  | 0.549013  | -0.841020 | H   | -0.605177 | 1.121491  | 1.072658  |
| H  | 2.013231  | -0.698363 | 1.035640  | H   | -1.888126 | 0.216949  | -0.945889 |
| C  | 2.741610  | 2.207713  | 0.105916  | C   | -1.577516 | 3.219159  | -0.062868 |
| H  | 3.264832  | 2.684415  | 0.935752  | H   | -1.840530 | 3.800482  | -0.948705 |
| H  | 2.959085  | 2.762862  | -0.808896 | H   | -1.553818 | 3.888644  | 0.800326  |
| H  | 3.122485  | 1.189422  | -0.000148 | H   | -2.359843 | 2.473347  | 0.096564  |
| C  | 1.256036  | 2.205175  | 0.379625  | C   | -0.230256 | 2.550391  | -0.250023 |
| H  | 1.031791  | 1.615848  | 1.273396  | H   | -0.272595 | 1.889189  | -1.124118 |
| C  | 0.654856  | 3.585200  | 0.492578  | C   | 0.897429  | 3.541880  | -0.436584 |
| H  | 0.851584  | 4.159541  | -0.414859 | H   | 0.970710  | 4.197874  | 0.434320  |
| H  | -0.423041 | 3.530657  | 0.653170  | H   | 1.849336  | 3.022220  | -0.564832 |
| H  | 1.101205  | 4.107790  | 1.339765  | H   | 0.718353  | 4.154971  | -1.321155 |
| O  | 0.598785  | 1.529106  | -0.743682 | O   | 0.106569  | 1.758864  | 0.903613  |
| H  | -0.351027 | 1.106869  | -0.434618 | H   | 1.225022  | 0.556125  | 0.072257  |
| Rg |           |           |           | TSg |           |           |           |

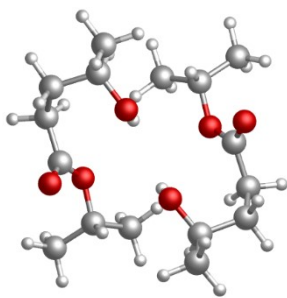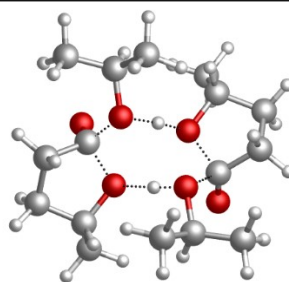

|   |           |           |           |   |           |           |           |
|---|-----------|-----------|-----------|---|-----------|-----------|-----------|
| C | 1.494771  | -3.339412 | 2.303191  | C | 1.681715  | 2.823365  | -1.967057 |
| H | 1.721281  | -2.720045 | 3.174446  | H | 1.877522  | 2.202057  | -2.843090 |
| H | 2.195049  | -4.175976 | 2.282921  | H | 2.333436  | 3.698941  | -2.003501 |
| H | 0.483329  | -3.734095 | 2.410402  | H | 0.644378  | 3.160568  | -1.997103 |
| C | 1.615509  | -2.515237 | 1.039410  | C | 1.957509  | 2.042777  | -0.706089 |
| C | 3.035178  | -2.003339 | 0.827563  | C | 3.372984  | 1.477310  | -0.592648 |
| H | 3.693917  | -2.862459 | 0.684713  | H | 4.035495  | 2.179489  | -0.090266 |
| H | 3.369089  | -1.476415 | 1.725798  | H | 3.773577  | 1.268824  | -1.587154 |
| C | 3.147826  | -1.082307 | -0.383514 | C | 3.201199  | 0.175355  | 0.184921  |
| H | 2.601774  | -1.484514 | -1.238332 | H | 2.976734  | 0.372320  | 1.232920  |
| H | 4.195447  | -0.986801 | -0.684750 | H | 4.058113  | -0.488030 | 0.102173  |
| C | 2.693389  | 0.329208  | -0.113736 | C | 2.003264  | -0.441476 | -0.506074 |
| O | 2.989630  | 0.968432  | 0.868660  | O | 2.034087  | -1.152941 | -1.483896 |
| O | 1.964472  | 0.824793  | -1.120256 | O | 0.993911  | -1.090173 | 0.689359  |
| C | 1.635289  | 2.243466  | -1.102486 | C | 1.202863  | -2.502022 | 0.999772  |
| H | 1.347331  | 2.505634  | -0.083130 | H | 0.930319  | -3.068837 | 0.105444  |
| C | 2.849037  | 3.042259  | -1.532207 | C | 2.652425  | -2.744395 | 1.354433  |
| H | 2.605151  | 4.105946  | -1.528924 | H | 2.757488  | -3.775487 | 1.694981  |
| H | 3.688329  | 2.882384  | -0.854944 | H | 3.311827  | -2.605640 | 0.498497  |
| H | 3.147852  | 2.758466  | -2.543609 | H | 2.965247  | -2.082383 | 2.164889  |
| C | 0.465495  | 2.402931  | -2.047510 | C | 0.266621  | -2.825821 | 2.145990  |
| H | 0.751829  | 2.112729  | -3.060693 | H | 0.576526  | -2.291051 | 3.046244  |
| H | -0.382874 | 1.787307  | -1.739240 | H | -0.760807 | -2.543021 | 1.909719  |
| H | 0.145299  | 3.445733  | -2.063605 | H | 0.290063  | -3.897687 | 2.347926  |
| O | 0.697323  | -1.421397 | 1.161217  | O | 1.094294  | 0.865054  | -0.673875 |
| H | 0.449770  | -1.115927 | 0.279726  | H | 0.176379  | 0.968790  | -0.013782 |
| H | 1.325865  | -3.121836 | 0.173135  | H | 1.717037  | 2.633775  | 0.178644  |
| C | -1.329776 | 3.280608  | 2.352878  | C | -1.844575 | -2.506149 | -2.223283 |
| H | -1.570587 | 2.674297  | 3.229414  | H | -2.073916 | -1.731707 | -2.958518 |

|                                                                                     |           |           |           |                                                                                      |           |           |           |
|-------------------------------------------------------------------------------------|-----------|-----------|-----------|--------------------------------------------------------------------------------------|-----------|-----------|-----------|
| H                                                                                   | -1.982008 | 4.155527  | 2.347715  | H                                                                                    | -2.528491 | -3.345021 | -2.372926 |
| H                                                                                   | -0.295982 | 3.619047  | 2.437782  | H                                                                                    | -0.823903 | -2.856181 | -2.388659 |
| C                                                                                   | -1.521234 | 2.465352  | 1.092005  | C                                                                                    | -2.006300 | -1.949512 | -0.826624 |
| C                                                                                   | -2.969254 | 2.024722  | 0.913896  | C                                                                                    | -3.410235 | -1.411878 | -0.522018 |
| H                                                                                   | -3.588026 | 2.916075  | 0.791213  | H                                                                                    | -4.027221 | -2.161666 | -0.028736 |
| H                                                                                   | -3.306628 | 1.509894  | 1.817931  | H                                                                                    | -3.904198 | -1.114922 | -1.450099 |
| C                                                                                   | -3.158552 | 1.118426  | -0.298561 | C                                                                                    | -3.146386 | -0.184554 | 0.343628  |
| H                                                                                   | -2.640480 | 1.515148  | -1.172837 | H                                                                                    | -2.883458 | -0.475859 | 1.362366  |
| H                                                                                   | -4.220718 | 1.052330  | -0.552704 | H                                                                                    | -3.982388 | 0.509713  | 0.363835  |
| C                                                                                   | -2.725741 | -0.305126 | -0.058939 | C                                                                                    | -1.933906 | 0.430411  | -0.365947 |
| O                                                                                   | -3.010823 | -0.952549 | 0.921445  | O                                                                                    | -2.104651 | 1.169993  | -1.371551 |
| O                                                                                   | -2.028745 | -0.798771 | -1.088425 | O                                                                                    | -0.945023 | 1.015698  | 0.646210  |
| C                                                                                   | -1.710421 | -2.219692 | -1.091037 | C                                                                                    | -1.146904 | 2.386157  | 1.075635  |
| H                                                                                   | -1.411465 | -2.494983 | -0.078367 | H                                                                                    | -0.849098 | 3.036784  | 0.247189  |
| C                                                                                   | -2.936137 | -3.003941 | -1.513114 | C                                                                                    | -2.586618 | 2.671674  | 1.452082  |
| H                                                                                   | -2.699380 | -4.069095 | -1.530506 | H                                                                                    | -2.637304 | 3.679109  | 1.869605  |
| H                                                                                   | -3.762926 | -2.849363 | -0.819336 | H                                                                                    | -3.250538 | 2.629556  | 0.590350  |
| H                                                                                   | -3.249934 | -2.701771 | -2.514610 | H                                                                                    | -2.934117 | 1.969509  | 2.212832  |
| C                                                                                   | -0.553886 | -2.377957 | -2.053016 | C                                                                                    | -0.220770 | 2.578979  | 2.262359  |
| H                                                                                   | -0.854889 | -2.088447 | -3.062137 | H                                                                                    | -0.586068 | 2.006113  | 3.117788  |
| H                                                                                   | 0.297095  | -1.758539 | -1.759306 | H                                                                                    | 0.792955  | 2.244155  | 2.036419  |
| H                                                                                   | -0.231559 | -3.419922 | -2.073143 | H                                                                                    | -0.182867 | 3.633678  | 2.539305  |
| O                                                                                   | -0.655237 | 1.328035  | 1.191202  | O                                                                                    | -1.120609 | -0.826144 | -0.642253 |
| H                                                                                   | -0.439516 | 1.011730  | 0.304939  | H                                                                                    | 0.058968  | -1.025081 | 0.232631  |
| H                                                                                   | -1.223351 | 3.059832  | 0.220345  | H                                                                                    | -1.725074 | -2.704024 | -0.086349 |
| Pg                                                                                  |           |           |           | Rh                                                                                   |           |           |           |
| 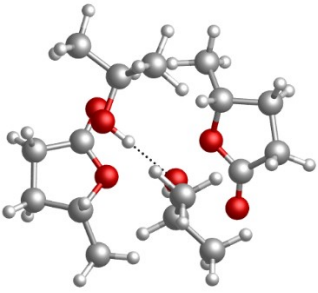 |           |           |           |  |           |           |           |
| C                                                                                   | -1.779651 | -3.082715 | -0.823854 | C                                                                                    | -3.717283 | 0.513101  | 0.756970  |
| H                                                                                   | -1.910164 | -3.255988 | -1.893747 | H                                                                                    | -3.656081 | -0.124513 | 1.642418  |
| H                                                                                   | -2.346382 | -3.836865 | -0.274515 | H                                                                                    | -4.562499 | 0.181001  | 0.150881  |

|   |           |           |           |   |           |           |           |
|---|-----------|-----------|-----------|---|-----------|-----------|-----------|
| H | -0.722392 | -3.200254 | -0.574640 | H | -3.905545 | 1.537766  | 1.081256  |
| C | -2.274506 | -1.712177 | -0.448527 | C | -2.424924 | 0.430678  | -0.030817 |
| C | -3.707231 | -1.375956 | -0.850344 | C | -2.180198 | -0.978101 | -0.561332 |
| H | -4.423604 | -1.712628 | -0.103854 | H | -2.968674 | -1.222539 | -1.276215 |
| H | -3.937515 | -1.850773 | -1.806461 | H | -2.249207 | -1.696538 | 0.260694  |
| C | -3.647327 | 0.139986  | -1.005111 | C | -0.822889 | -1.113706 | -1.248653 |
| H | -3.816595 | 0.654013  | -0.056055 | H | -0.649398 | -0.286954 | -1.938992 |
| H | -4.314522 | 0.558590  | -1.755540 | H | -0.787263 | -2.043030 | -1.823212 |
| C | -2.209442 | 0.382946  | -1.392414 | C | 0.309003  | -1.200288 | -0.259717 |
| O | -1.720290 | 1.372807  | -1.875203 | O | 0.347729  | -1.979674 | 0.663109  |
| O | -1.504697 | 0.901582  | 1.397897  | O | 1.309950  | -0.356528 | -0.543000 |
| C | -0.997233 | 2.233465  | 1.289215  | C | 2.456799  | -0.316039 | 0.355264  |
| H | -0.542686 | 2.358599  | 0.299044  | H | 2.703119  | -1.346413 | 0.613452  |
| C | -2.178333 | 3.174599  | 1.399989  | C | 3.576242  | 0.315928  | -0.440938 |
| H | -1.847949 | 4.212469  | 1.329284  | H | 4.481461  | 0.352823  | 0.166962  |
| H | -2.895439 | 2.987175  | 0.598017  | H | 3.789177  | -0.260859 | -1.341905 |
| H | -2.682738 | 3.036394  | 2.360083  | H | 3.312569  | 1.336865  | -0.727374 |
| C | 0.051009  | 2.492974  | 2.358747  | C | 2.094309  | 0.473818  | 1.596654  |
| H | -0.396333 | 2.416204  | 3.353429  | H | 1.828092  | 1.498962  | 1.328915  |
| H | 0.861544  | 1.762434  | 2.291928  | H | 1.259843  | 0.016956  | 2.128600  |
| H | 0.481963  | 3.490491  | 2.244881  | H | 2.954070  | 0.505194  | 2.268355  |
| O | -1.475973 | -0.716597 | -1.155153 | O | -1.348006 | 0.838533  | 0.818403  |
| H | 0.391024  | -1.217577 | 0.020555  | H | -0.754307 | 1.408729  | 0.299115  |
| H | -2.128866 | -1.519503 | 0.617938  | H | -2.473043 | 1.117329  | -0.884371 |
| C | 1.676332  | 2.723427  | -1.644496 | H | 0.808263  | 1.460549  | -1.181592 |
| H | 2.244843  | 2.747940  | -2.576331 | O | 0.333095  | 2.270493  | -0.939631 |
| H | 1.900732  | 3.628166  | -1.075399 | H | -0.019076 | 2.629730  | -1.762623 |
| H | 0.610653  | 2.714799  | -1.875766 |   |           |           |           |
| C | 2.061951  | 1.520442  | -0.826330 |   |           |           |           |
| C | 3.550065  | 1.379103  | -0.516178 |   |           |           |           |
| H | 3.824096  | 1.921049  | 0.386755  |   |           |           |           |
| H | 4.135410  | 1.764077  | -1.354001 |   |           |           |           |
| C | 3.715589  | -0.131354 | -0.398616 |   |           |           |           |
| H | 3.498688  | -0.488880 | 0.611893  |   |           |           |           |
| H | 4.682568  | -0.522926 | -0.706900 |   |           |           |           |

|                                                                                     |           |           |           |                                                                                      |           |           |           |
|-------------------------------------------------------------------------------------|-----------|-----------|-----------|--------------------------------------------------------------------------------------|-----------|-----------|-----------|
| C                                                                                   | 2.624925  | -0.659170 | -1.296680 |                                                                                      |           |           |           |
| O                                                                                   | 2.493180  | -1.774537 | -1.738669 |                                                                                      |           |           |           |
| O                                                                                   | 0.615840  | -0.897424 | 0.906615  |                                                                                      |           |           |           |
| C                                                                                   | 0.589160  | -1.993930 | 1.837748  |                                                                                      |           |           |           |
| H                                                                                   | -0.400316 | -2.462975 | 1.791922  |                                                                                      |           |           |           |
| C                                                                                   | 1.647270  | -3.020142 | 1.482860  |                                                                                      |           |           |           |
| H                                                                                   | 1.610557  | -3.856233 | 2.184264  |                                                                                      |           |           |           |
| H                                                                                   | 1.489942  | -3.413625 | 0.476381  |                                                                                      |           |           |           |
| H                                                                                   | 2.643044  | -2.572035 | 1.529555  |                                                                                      |           |           |           |
| C                                                                                   | 0.796626  | -1.391628 | 3.211109  |                                                                                      |           |           |           |
| H                                                                                   | 1.771344  | -0.899412 | 3.264271  |                                                                                      |           |           |           |
| H                                                                                   | 0.020466  | -0.655500 | 3.430379  |                                                                                      |           |           |           |
| H                                                                                   | 0.760891  | -2.169724 | 3.975166  |                                                                                      |           |           |           |
| O                                                                                   | 1.743330  | 0.308786  | -1.574984 |                                                                                      |           |           |           |
| H                                                                                   | -0.765035 | 0.281900  | 1.247227  |                                                                                      |           |           |           |
| H                                                                                   | 1.476424  | 1.464442  | 0.093497  |                                                                                      |           |           |           |
| TSh                                                                                 |           |           |           | Ph                                                                                   |           |           |           |
| 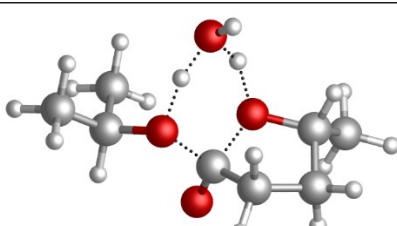 |           |           |           |  |           |           |           |
| C                                                                                   | -3.178762 | 0.854138  | 1.037474  | C                                                                                    | -3.427812 | 0.405652  | -1.148340 |
| H                                                                                   | -2.963506 | 0.192785  | 1.879802  | H                                                                                    | -4.122426 | 0.408872  | -0.306306 |
| H                                                                                   | -4.226565 | 0.728358  | 0.754542  | H                                                                                    | -3.846513 | -0.215381 | -1.942341 |
| H                                                                                   | -3.028324 | 1.887489  | 1.354332  | H                                                                                    | -3.321482 | 1.422432  | -1.528283 |
| C                                                                                   | -2.281882 | 0.505730  | -0.128808 | C                                                                                    | -2.097492 | -0.160415 | -0.729227 |
| C                                                                                   | -2.442073 | -0.937728 | -0.629683 | C                                                                                    | -2.135457 | -1.564823 | -0.129843 |
| H                                                                                   | -3.166480 | -0.997517 | -1.440681 | H                                                                                    | -2.052640 | -2.329119 | -0.899625 |
| H                                                                                   | -2.781608 | -1.580456 | 0.185616  | H                                                                                    | -3.074494 | -1.704156 | 0.409473  |
| C                                                                                   | -1.031277 | -1.325583 | -1.046414 | C                                                                                    | -0.960619 | -1.547608 | 0.842752  |
| H                                                                                   | -0.757795 | -0.840508 | -1.986419 | H                                                                                    | -0.022207 | -1.838546 | 0.363839  |
| H                                                                                   | -0.870345 | -2.398959 | -1.130688 | H                                                                                    | -1.093418 | -2.147232 | 1.740666  |
| C                                                                                   | -0.201258 | -0.763896 | 0.104665  | C                                                                                    | -0.839892 | -0.090708 | 1.206137  |
| O                                                                                   | -0.123210 | -1.380155 | 1.189274  | O                                                                                    | -0.229584 | 0.413293  | 2.114095  |

|                                                                                     |           |           |           |                                                                                      |           |           |           |
|-------------------------------------------------------------------------------------|-----------|-----------|-----------|--------------------------------------------------------------------------------------|-----------|-----------|-----------|
| O                                                                                   | 1.149138  | -0.356362 | -0.474571 | O                                                                                    | 1.345031  | 0.127401  | -0.912796 |
| C                                                                                   | 2.278152  | -0.346721 | 0.434194  | C                                                                                    | 2.388987  | -0.411379 | -0.098367 |
| H                                                                                   | 2.214525  | -1.268527 | 1.010667  | H                                                                                    | 1.988623  | -0.619069 | 0.902071  |
| C                                                                                   | 3.520287  | -0.352498 | -0.433075 | C                                                                                    | 2.823421  | -1.713742 | -0.738726 |
| H                                                                                   | 4.410274  | -0.384885 | 0.197609  | H                                                                                    | 3.586632  | -2.203178 | -0.131471 |
| H                                                                                   | 3.530582  | -1.222459 | -1.091026 | H                                                                                    | 1.976649  | -2.395380 | -0.842024 |
| H                                                                                   | 3.568317  | 0.552675  | -1.044081 | H                                                                                    | 3.237521  | -1.524272 | -1.732312 |
| C                                                                                   | 2.220498  | 0.850973  | 1.364624  | C                                                                                    | 3.536406  | 0.575819  | 0.029780  |
| H                                                                                   | 2.288445  | 1.785769  | 0.802434  | H                                                                                    | 3.959940  | 0.792581  | -0.954245 |
| H                                                                                   | 1.297744  | 0.853090  | 1.945369  | H                                                                                    | 3.192317  | 1.512314  | 0.474811  |
| H                                                                                   | 3.061553  | 0.811429  | 2.059692  | H                                                                                    | 4.324094  | 0.167585  | 0.666191  |
| O                                                                                   | -0.895165 | 0.645484  | 0.250994  | O                                                                                    | -1.553726 | 0.661561  | 0.349518  |
| H                                                                                   | -0.230222 | 1.539161  | -0.653191 | H                                                                                    | -0.458310 | 2.350427  | 0.059587  |
| H                                                                                   | -2.456216 | 1.201423  | -0.956888 | H                                                                                    | -1.371797 | -0.109094 | -1.543577 |
| H                                                                                   | 1.015722  | 0.765851  | -1.094898 | H                                                                                    | 1.135683  | 1.030315  | -0.610806 |
| O                                                                                   | 0.564064  | 1.792371  | -1.314144 | O                                                                                    | 0.428581  | 2.689280  | -0.134356 |
| H                                                                                   | 0.233171  | 1.858083  | -2.222468 | H                                                                                    | 0.314169  | 3.311848  | -0.862339 |
| R5                                                                                  |           |           |           | TS5                                                                                  |           |           |           |
| 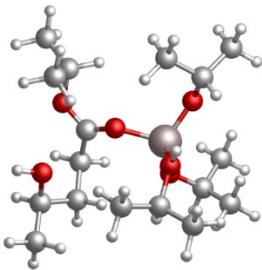 |           |           |           |  |           |           |           |
| C                                                                                   | -3.369728 | -3.385362 | 0.316848  | C                                                                                    | -3.191377 | -2.961989 | 0.641718  |
| H                                                                                   | -2.492905 | -3.598899 | 0.932114  | H                                                                                    | -2.238484 | -3.156684 | 1.136055  |
| H                                                                                   | -3.476555 | -4.178331 | -0.425875 | H                                                                                    | -3.551324 | -3.894677 | 0.203633  |
| H                                                                                   | -4.255209 | -3.397155 | 0.955814  | H                                                                                    | -3.919312 | -2.627527 | 1.381690  |
| C                                                                                   | -3.224623 | -2.039220 | -0.364762 | C                                                                                    | -3.028377 | -1.941186 | -0.451856 |
| C                                                                                   | -1.962035 | -1.948302 | -1.200628 | C                                                                                    | -1.951229 | -2.224628 | -1.489975 |
| H                                                                                   | -1.966830 | -2.738107 | -1.952686 | H                                                                                    | -2.313094 | -2.905054 | -2.258500 |
| H                                                                                   | -1.089187 | -2.110295 | -0.559449 | H                                                                                    | -1.076955 | -2.670765 | -1.009123 |
| C                                                                                   | -1.852841 | -0.601447 | -1.919384 | C                                                                                    | -1.615037 | -0.838572 | -2.036813 |
| H                                                                                   | -2.755108 | -0.387808 | -2.490821 | H                                                                                    | -2.392545 | -0.494470 | -2.718322 |
| H                                                                                   | -0.996109 | -0.615624 | -2.598245 | H                                                                                    | -0.644201 | -0.781211 | -2.521689 |
| C                                                                                   | -1.608075 | 0.528390  | -0.980424 | C                                                                                    | -1.633155 | 0.032697  | -0.792469 |

|   |           |           |           |   |           |           |           |
|---|-----------|-----------|-----------|---|-----------|-----------|-----------|
| O | -0.600539 | 0.589917  | -0.236287 | O | -0.533402 | 0.392161  | -0.208643 |
| O | -2.456939 | 1.491099  | -1.001725 | O | -2.602091 | 1.157241  | -0.916849 |
| C | -2.238129 | 2.680302  | -0.154141 | C | -2.206740 | 2.516375  | -0.520993 |
| H | -1.170952 | 2.893262  | -0.193540 | H | -1.148645 | 2.594770  | -0.770018 |
| C | -3.033550 | 3.782696  | -0.807302 | C | -3.029226 | 3.457066  | -1.370522 |
| H | -2.882099 | 4.707566  | -0.249319 | H | -2.758555 | 4.486069  | -1.129053 |
| H | -2.706479 | 3.942233  | -1.835067 | H | -2.842669 | 3.287886  | -2.431087 |
| H | -4.098340 | 3.543427  | -0.802105 | H | -4.093778 | 3.324614  | -1.168106 |
| C | -2.679673 | 2.364543  | 1.257060  | C | -2.427738 | 2.698572  | 0.964413  |
| H | -3.749465 | 2.148784  | 1.280712  | H | -3.491289 | 2.612430  | 1.201290  |
| H | -2.134079 | 1.516320  | 1.670991  | H | -1.872506 | 1.956551  | 1.539481  |
| H | -2.487635 | 3.236695  | 1.884349  | H | -2.089572 | 3.691440  | 1.264528  |
| O | -3.134995 | -0.976838 | 0.592442  | O | -2.575494 | -0.669230 | 0.142103  |
| H | -3.983036 | -0.886157 | 1.044148  | H | -3.167290 | 0.380062  | -0.140356 |
| H | -4.090348 | -1.858271 | -1.012057 | H | -3.981818 | -1.729848 | -0.940166 |
| C | 2.072546  | -2.742823 | 2.506731  | C | 0.921708  | -2.960615 | 2.543870  |
| H | 1.846195  | -3.794740 | 2.685944  | H | 0.163025  | -3.673254 | 2.870929  |
| H | 2.189636  | -2.249211 | 3.474694  | H | 1.534446  | -2.692216 | 3.407919  |
| H | 3.010432  | -2.676399 | 1.955506  | H | 1.550653  | -3.440795 | 1.793974  |
| C | 0.939604  | -2.117410 | 1.731173  | C | 0.244571  | -1.737307 | 1.975965  |
| H | 0.840296  | -2.576840 | 0.747325  | H | -0.306162 | -1.993972 | 1.069076  |
| C | -0.377220 | -2.105828 | 2.467417  | C | -0.649163 | -1.013506 | 2.954347  |
| H | -0.269264 | -1.590619 | 3.425359  | H | -0.084317 | -0.724210 | 3.844220  |
| H | -1.154307 | -1.613822 | 1.880717  | H | -1.083503 | -0.122297 | 2.499836  |
| H | -0.685602 | -3.133217 | 2.667469  | H | -1.461807 | -1.673191 | 3.263590  |
| O | 1.313019  | -0.720812 | 1.414964  | O | 1.277335  | -0.806938 | 1.493339  |
| C | 3.205670  | -0.487555 | -2.929245 | C | 3.353444  | -0.622218 | -2.866540 |
| H | 4.065712  | -0.914537 | -3.449456 | H | 4.280856  | -0.998756 | -3.303534 |
| H | 3.555356  | 0.342213  | -2.308444 | H | 3.566056  | 0.329121  | -2.370911 |
| H | 2.512309  | -0.093638 | -3.674650 | H | 2.640154  | -0.441579 | -3.672918 |
| C | 2.524245  | -1.538589 | -2.069364 | C | 2.783968  | -1.616148 | -1.867487 |
| H | 2.208473  | -2.367356 | -2.711186 | H | 2.598720  | -2.564073 | -2.383968 |
| C | 3.455564  | -2.081337 | -0.997890 | C | 3.751729  | -1.872980 | -0.721716 |
| H | 3.789793  | -1.272656 | -0.338180 | H | 3.977308  | -0.939784 | -0.194274 |
| H | 2.949445  | -2.839558 | -0.397113 | H | 3.331758  | -2.585842 | -0.009161 |



|                                                                                     |          |           |           |                                                                                      |           |           |           |
|-------------------------------------------------------------------------------------|----------|-----------|-----------|--------------------------------------------------------------------------------------|-----------|-----------|-----------|
| H                                                                                   | 4.342061 | -2.534901 | -1.445983 | H                                                                                    | 4.693084  | -2.280144 | -1.096526 |
| O                                                                                   | 1.343387 | -1.006397 | -1.481896 | O                                                                                    | 1.528058  | -1.157434 | -1.387189 |
| C                                                                                   | 3.450413 | 3.387220  | 0.602022  | C                                                                                    | 3.291966  | 3.414887  | 0.616532  |
| H                                                                                   | 3.744969 | 4.006528  | 1.451639  | H                                                                                    | 3.508310  | 4.086929  | 1.449254  |
| H                                                                                   | 3.025548 | 4.035052  | -0.169060 | H                                                                                    | 2.791058  | 3.984520  | -0.170641 |
| H                                                                                   | 4.343353 | 2.907337  | 0.197734  | H                                                                                    | 4.237763  | 3.038907  | 0.221857  |
| C                                                                                   | 2.430057 | 2.346769  | 1.023867  | C                                                                                    | 2.408897  | 2.264720  | 1.062960  |
| H                                                                                   | 2.880431 | 1.710441  | 1.797895  | H                                                                                    | 2.926614  | 1.715383  | 1.861912  |
| C                                                                                   | 1.175439 | 2.991490  | 1.594377  | C                                                                                    | 1.074294  | 2.756218  | 1.603505  |
| H                                                                                   | 0.732218 | 3.666388  | 0.857739  | H                                                                                    | 0.521560  | 3.276476  | 0.816263  |
| H                                                                                   | 0.430787 | 2.237091  | 1.866690  | H                                                                                    | 0.464270  | 1.920987  | 1.960061  |
| H                                                                                   | 1.412530 | 3.568317  | 2.490834  | H                                                                                    | 1.222071  | 3.444337  | 2.438719  |
| O                                                                                   | 2.113436 | 1.539719  | -0.102840 | O                                                                                    | 2.216172  | 1.390980  | -0.040191 |
| Al                                                                                  | 1.153955 | 0.126816  | -0.216629 | Al                                                                                   | 1.198408  | 0.014732  | -0.174992 |
| H                                                                                   | 1.497612 | -0.216841 | 2.226358  | H                                                                                    | 1.854973  | -0.494208 | 2.208789  |
| P5                                                                                  |          |           |           | R5'                                                                                  |           |           |           |
| 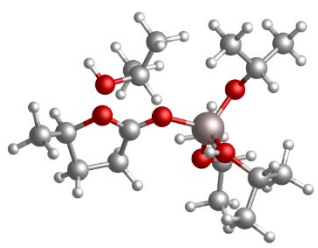 |          |           |           |  |           |           |           |
| C                                                                                   | 4.809357 | -2.284063 | -1.351500 | C                                                                                    | -1.164266 | 2.434390  | 2.884199  |
| H                                                                                   | 4.243602 | -3.192724 | -1.562928 | H                                                                                    | -2.083301 | 2.918469  | 3.223275  |
| H                                                                                   | 5.713980 | -2.557191 | -0.805619 | H                                                                                    | -0.424361 | 3.206785  | 2.662086  |
| H                                                                                   | 5.101718 | -1.812023 | -2.289536 | H                                                                                    | -0.776562 | 1.817489  | 3.698190  |
| C                                                                                   | 4.002552 | -1.344439 | -0.501928 | C                                                                                    | -1.434106 | 1.588826  | 1.654665  |
| C                                                                                   | 3.482000 | -1.905301 | 0.819301  | C                                                                                    | -2.008074 | 2.399510  | 0.506403  |
| H                                                                                   | 4.162800 | -1.680232 | 1.636349  | H                                                                                    | -1.313680 | 3.208826  | 0.270911  |
| H                                                                                   | 3.367001 | -2.987072 | 0.738676  | H                                                                                    | -2.951069 | 2.857617  | 0.818929  |
| C                                                                                   | 2.116851 | -1.236801 | 0.981687  | C                                                                                    | -2.221819 | 1.547093  | -0.743041 |
| H                                                                                   | 2.146604 | -0.317368 | 1.570999  | H                                                                                    | -1.327010 | 0.963779  | -0.966501 |
| H                                                                                   | 1.336635 | -1.876962 | 1.391322  | H                                                                                    | -2.434774 | 2.189322  | -1.602147 |
| C                                                                                   | 1.783511 | -0.856158 | -0.421714 | C                                                                                    | -3.404182 | 0.623363  | -0.615195 |
| O                                                                                   | 0.683451 | -0.464565 | -0.865650 | O                                                                                    | -4.512892 | 0.978392  | -0.281079 |
| O                                                                                   | 2.906522 | 1.602556  | 0.148867  | O                                                                                    | -3.113709 | -0.627504 | -0.974200 |

|   |           |           |           |   |           |           |           |
|---|-----------|-----------|-----------|---|-----------|-----------|-----------|
| C | 1.739426  | 2.401724  | 0.384453  | C | -4.157344 | -1.633342 | -0.876620 |
| H | 1.015787  | 1.701500  | 0.811714  | H | -5.089270 | -1.179543 | -1.215958 |
| C | 2.027851  | 3.487727  | 1.403625  | C | -3.742873 | -2.749324 | -1.808379 |
| H | 1.120188  | 4.046937  | 1.639209  | H | -4.503972 | -3.531019 | -1.805037 |
| H | 2.418981  | 3.057848  | 2.327526  | H | -3.627836 | -2.381075 | -2.828670 |
| H | 2.766513  | 4.190498  | 1.007156  | H | -2.796599 | -3.185023 | -1.480622 |
| C | 1.207039  | 2.959932  | -0.922479 | C | -4.281242 | -2.085712 | 0.564725  |
| H | 1.925852  | 3.667396  | -1.346981 | H | -3.333839 | -2.510003 | 0.907485  |
| H | 1.041923  | 2.157937  | -1.644185 | H | -4.556004 | -1.257243 | 1.217685  |
| H | 0.263017  | 3.485914  | -0.765142 | H | -5.051841 | -2.854755 | 0.641547  |
| O | 2.763805  | -0.997830 | -1.240616 | O | -2.384165 | 0.554439  | 1.941667  |
| H | 3.561158  | 2.151236  | -0.303864 | H | -1.979119 | -0.076588 | 2.549955  |
| H | 4.508069  | -0.390310 | -0.358491 | H | -0.501706 | 1.122180  | 1.315372  |
| C | -3.336109 | 2.410686  | -2.147411 | C | 5.289797  | -0.228850 | 1.143539  |
| H | -3.904108 | 2.464394  | -3.078213 | H | 6.359468  | -0.009903 | 1.147771  |
| H | -2.705635 | 3.300783  | -2.072794 | H | 5.045249  | -0.789356 | 2.049377  |
| H | -4.039340 | 2.413340  | -1.312321 | H | 4.750191  | 0.721796  | 1.164889  |
| C | -2.475400 | 1.162254  | -2.112714 | C | 4.911340  | -1.036512 | -0.086113 |
| H | -3.129442 | 0.282287  | -2.186819 | H | 5.156385  | -0.455304 | -0.982523 |
| C | -1.484851 | 1.125058  | -3.264788 | C | 5.644694  | -2.362624 | -0.140865 |
| H | -0.823202 | 1.993685  | -3.222157 | H | 5.403921  | -2.958450 | 0.743312  |
| H | -0.872173 | 0.220167  | -3.225146 | H | 5.355060  | -2.927081 | -1.028933 |
| H | -2.009864 | 1.135423  | -4.222322 | H | 6.724267  | -2.203475 | -0.168904 |
| O | -1.792044 | 1.123053  | -0.866052 | O | 3.507748  | -1.304150 | -0.076584 |
| C | -2.586608 | -3.749532 | 0.245549  | C | 2.175461  | 3.734934  | -0.906223 |
| H | -3.506591 | -4.288039 | 0.477898  | H | 1.426002  | 4.517925  | -1.039643 |
| H | -2.056886 | -3.540835 | 1.177624  | H | 2.973415  | 3.889644  | -1.636952 |
| H | -1.966247 | -4.389234 | -0.384565 | H | 2.598943  | 3.830223  | 0.095293  |
| C | -2.929226 | -2.459777 | -0.458970 | C | 1.554225  | 2.364989  | -1.096117 |
| H | -3.424262 | -2.644473 | -1.411801 | H | 0.752231  | 2.234147  | -0.358671 |
| C | -3.739053 | -1.510321 | 0.388996  | C | 0.969939  | 2.193087  | -2.487001 |
| H | -3.272777 | -1.369370 | 1.366212  | H | 1.753036  | 2.313798  | -3.239980 |
| H | -3.876672 | -0.543469 | -0.100469 | H | 0.527545  | 1.200421  | -2.604010 |
| H | -4.726244 | -1.945630 | 0.547767  | H | 0.192283  | 2.937277  | -2.673511 |
| O | -1.665208 | -1.775373 | -0.810976 | O | 2.560783  | 1.375107  | -0.867300 |

|                                                                                    |           |           |           |                                                                                     |           |           |           |
|------------------------------------------------------------------------------------|-----------|-----------|-----------|-------------------------------------------------------------------------------------|-----------|-----------|-----------|
| C                                                                                  | -1.598907 | -0.280220 | 3.817690  | C                                                                                   | 0.069437  | -2.959176 | -0.184200 |
| H                                                                                  | -2.184987 | 0.233573  | 4.582198  | H                                                                                   | -0.521430 | -3.746601 | 0.288965  |
| H                                                                                  | -0.579406 | -0.408394 | 4.191194  | H                                                                                   | 1.120109  | -3.265418 | -0.171665 |
| H                                                                                  | -2.034129 | -1.268716 | 3.655450  | H                                                                                   | -0.251221 | -2.860642 | -1.222852 |
| C                                                                                  | -1.582090 | 0.515419  | 2.525671  | C                                                                                   | -0.099628 | -1.642008 | 0.551753  |
| H                                                                                  | -2.614529 | 0.638585  | 2.173859  | H                                                                                   | -1.154822 | -1.353401 | 0.534644  |
| C                                                                                  | -0.975030 | 1.895010  | 2.716838  | C                                                                                   | 0.362308  | -1.734522 | 1.996262  |
| H                                                                                  | 0.063509  | 1.807443  | 3.048411  | H                                                                                   | 1.413666  | -2.036745 | 2.041760  |
| H                                                                                  | -0.997350 | 2.459765  | 1.781361  | H                                                                                   | 0.257715  | -0.768966 | 2.497973  |
| H                                                                                  | -1.532265 | 2.458046  | 3.468835  | H                                                                                   | -0.226861 | -2.473686 | 2.543719  |
| O                                                                                  | -0.837188 | -0.218118 | 1.558521  | O                                                                                   | 0.601687  | -0.609469 | -0.128663 |
| Al                                                                                 | -0.970194 | -0.190964 | -0.145597 | Al                                                                                  | 2.233706  | -0.212668 | -0.341849 |
| H                                                                                  | -1.131290 | -2.317162 | -1.414242 |                                                                                     |           |           |           |
| TS5'                                                                               |           |           |           | P5'                                                                                 |           |           |           |
| 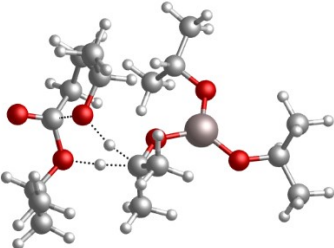 |           |           |           |  |           |           |           |
| C                                                                                  | -2.089608 | 1.935181  | 3.026486  | C                                                                                   | -2.768161 | 0.348793  | 2.990100  |
| H                                                                                  | -3.169684 | 2.096993  | 3.013210  | H                                                                                   | -3.823068 | 0.425172  | 3.261725  |
| H                                                                                  | -1.601872 | 2.858340  | 3.348529  | H                                                                                   | -2.218134 | 1.131800  | 3.515944  |
| H                                                                                  | -1.859380 | 1.153303  | 3.752634  | H                                                                                   | -2.386241 | -0.620301 | 3.316042  |
| C                                                                                  | -1.608009 | 1.552545  | 1.645631  | C                                                                                   | -2.602347 | 0.531969  | 1.504160  |
| C                                                                                  | -1.913488 | 2.594813  | 0.560211  | C                                                                                   | -3.118839 | 1.857613  | 0.946161  |
| H                                                                                  | -1.100013 | 3.312655  | 0.458434  | H                                                                                   | -2.343378 | 2.622295  | 0.958515  |
| H                                                                                  | -2.824505 | 3.142398  | 0.813569  | H                                                                                   | -3.964765 | 2.200471  | 1.545709  |
| C                                                                                  | -2.138769 | 1.750690  | -0.686897 | C                                                                                   | -3.577253 | 1.475644  | -0.456907 |
| H                                                                                  | -1.192924 | 1.347882  | -1.054011 | H                                                                                   | -2.771631 | 1.547896  | -1.191243 |
| H                                                                                  | -2.655457 | 2.274564  | -1.489547 | H                                                                                   | -4.440451 | 2.025462  | -0.826125 |
| C                                                                                  | -3.024313 | 0.630859  | -0.149208 | C                                                                                   | -3.912740 | 0.011954  | -0.319340 |
| O                                                                                  | -4.246836 | 0.821730  | 0.011711  | O                                                                                   | -4.567493 | -0.677898 | -1.061156 |
| O                                                                                  | -2.663877 | -0.652174 | -0.870433 | O                                                                                   | -1.373650 | -0.554040 | -1.487719 |
| C                                                                                  | -3.726832 | -1.633274 | -0.969296 | C                                                                                   | -1.346686 | -1.779919 | -2.222600 |
| H                                                                                  | -4.632715 | -1.071150 | -1.190281 | H                                                                                   | -2.075907 | -1.648310 | -3.025755 |

|   |           |           |           |   |           |           |           |
|---|-----------|-----------|-----------|---|-----------|-----------|-----------|
| C | -3.406632 | -2.549719 | -2.132791 | C | 0.031136  | -2.004976 | -2.825950 |
| H | -4.267504 | -3.190672 | -2.332170 | H | 0.036979  | -2.887530 | -3.469215 |
| H | -3.195735 | -1.970122 | -3.032891 | H | 0.334699  | -1.141449 | -3.420989 |
| H | -2.551276 | -3.190515 | -1.915690 | H | 0.770508  | -2.165298 | -2.033561 |
| C | -3.895095 | -2.377881 | 0.343059  | C | -1.775203 | -2.937800 | -1.337656 |
| H | -2.976640 | -2.909120 | 0.607947  | H | -1.069028 | -3.054742 | -0.509760 |
| H | -4.148677 | -1.692324 | 1.152258  | H | -2.769373 | -2.761503 | -0.923704 |
| H | -4.696293 | -3.113731 | 0.250321  | H | -1.794771 | -3.871770 | -1.903269 |
| O | -2.259128 | 0.338323  | 1.214464  | O | -3.398257 | -0.478028 | 0.817813  |
| H | -1.355903 | -0.661345 | 0.767288  | H | -0.748988 | -1.861150 | 1.727982  |
| H | -0.532106 | 1.351607  | 1.662101  | H | -1.564931 | 0.366833  | 1.201181  |
| C | 5.201904  | -0.486440 | 1.306730  | C | 4.896996  | 1.293137  | 0.660441  |
| H | 6.292383  | -0.437276 | 1.332028  | H | 5.820089  | 1.816692  | 0.403640  |
| H | 4.854133  | -0.969812 | 2.223049  | H | 4.993935  | 0.893104  | 1.672907  |
| H | 4.819329  | 0.537227  | 1.283432  | H | 4.082742  | 2.023348  | 0.648404  |
| C | 4.730174  | -1.267026 | 0.092705  | C | 4.627057  | 0.165634  | -0.321302 |
| H | 5.070885  | -0.754431 | -0.814024 | H | 4.512701  | 0.588490  | -1.325685 |
| C | 5.260365  | -2.687011 | 0.087606  | C | 5.749259  | -0.853921 | -0.338241 |
| H | 4.926369  | -3.214655 | 0.984605  | H | 5.880749  | -1.283274 | 0.658309  |
| H | 4.900741  | -3.228436 | -0.789021 | H | 5.524922  | -1.661749 | -1.036722 |
| H | 6.351804  | -2.688661 | 0.070373  | H | 6.687420  | -0.385377 | -0.641535 |
| O | 3.301183  | -1.326940 | 0.079108  | O | 3.417394  | -0.508942 | 0.035873  |
| C | 2.417713  | 3.850192  | -0.799552 | C | 0.502276  | 3.398406  | 0.240693  |
| H | 1.724840  | 4.673853  | -0.982721 | H | -0.373833 | 4.047563  | 0.298784  |
| H | 3.259202  | 3.944278  | -1.490616 | H | 1.369909  | 4.010273  | -0.018966 |
| H | 2.795037  | 3.936107  | 0.220836  | H | 0.670649  | 2.958132  | 1.227736  |
| C | 1.724069  | 2.518126  | -1.002547 | C | 0.301273  | 2.311564  | -0.800590 |
| H | 0.878939  | 2.447881  | -0.306568 | H | -0.530739 | 1.669817  | -0.485432 |
| C | 1.202692  | 2.355492  | -2.419348 | C | -0.015252 | 2.873891  | -2.171596 |
| H | 2.025046  | 2.433394  | -3.135159 | H | 0.805905  | 3.508162  | -2.515773 |
| H | 0.723055  | 1.381464  | -2.548202 | H | -0.157920 | 2.065733  | -2.891651 |
| H | 0.465852  | 3.128626  | -2.648842 | H | -0.927057 | 3.473987  | -2.140896 |
| O | 2.655419  | 1.471318  | -0.704514 | O | 1.492749  | 1.527865  | -0.894255 |
| C | -0.218182 | -2.586560 | -0.529050 | C | 1.146033  | -2.858799 | 1.586524  |
| H | -0.905285 | -3.374031 | -0.218869 | H | 0.941506  | -3.535066 | 2.418977  |

|                                                                                    |           |           |           |                                                                                     |           |           |           |
|------------------------------------------------------------------------------------|-----------|-----------|-----------|-------------------------------------------------------------------------------------|-----------|-----------|-----------|
| H                                                                                  | 0.803219  | -2.967523 | -0.444420 | H                                                                                   | 2.211780  | -2.613561 | 1.596116  |
| H                                                                                  | -0.411609 | -2.326148 | -1.570276 | H                                                                                   | 0.918301  | -3.380685 | 0.655441  |
| C                                                                                  | -0.331654 | -1.361300 | 0.374218  | C                                                                                   | 0.314436  | -1.596019 | 1.717614  |
| H                                                                                  | -1.542422 | -1.086234 | -0.186390 | H                                                                                   | -0.814934 | -0.672927 | -0.696485 |
| C                                                                                  | -0.038448 | -1.743116 | 1.823614  | C                                                                                   | 0.652613  | -0.820474 | 2.977972  |
| H                                                                                  | 0.949266  | -2.209360 | 1.871974  | H                                                                                   | 1.719348  | -0.570775 | 2.987078  |
| H                                                                                  | -0.048913 | -0.865688 | 2.472483  | H                                                                                   | 0.076548  | 0.105607  | 3.026874  |
| H                                                                                  | -0.779536 | -2.456626 | 2.187930  | H                                                                                   | 0.434765  | -1.412196 | 3.869401  |
| O                                                                                  | 0.506612  | -0.331071 | -0.081651 | O                                                                                   | 0.496610  | -0.753588 | 0.580445  |
| Al                                                                                 | 2.183542  | -0.091203 | -0.226323 | Al                                                                                  | 1.831945  | 0.084899  | -0.064531 |
| R5''                                                                               |           |           |           | TS5''                                                                               |           |           |           |
| 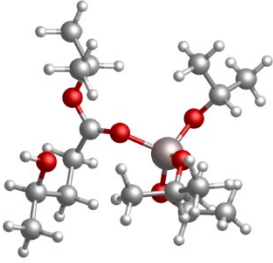 |           |           |           |  |           |           |           |
| C                                                                                  | -3.860059 | -2.930499 | 0.193144  | C                                                                                   | -4.349472 | -2.441398 | 0.946649  |
| H                                                                                  | -2.999079 | -3.239727 | 0.790192  | H                                                                                   | -3.568260 | -2.794544 | 1.621565  |
| H                                                                                  | -4.054852 | -3.694876 | -0.561899 | H                                                                                   | -4.820767 | -3.304894 | 0.473578  |
| H                                                                                  | -4.732514 | -2.868176 | 0.847002  | H                                                                                   | -5.108066 | -1.910054 | 1.522216  |
| C                                                                                  | -3.587705 | -1.591086 | -0.463380 | C                                                                                   | -3.759896 | -1.557436 | -0.119030 |
| C                                                                                  | -2.362350 | -1.632726 | -1.358333 | C                                                                                   | -2.631929 | -2.166000 | -0.942315 |
| H                                                                                  | -2.540813 | -2.336801 | -2.172334 | H                                                                                   | -3.018707 | -2.777568 | -1.755386 |
| H                                                                                  | -1.501076 | -1.998077 | -0.794840 | H                                                                                   | -1.999214 | -2.784791 | -0.300947 |
| C                                                                                  | -2.040467 | -0.266005 | -1.962112 | C                                                                                   | -1.856447 | -0.945877 | -1.431323 |
| H                                                                                  | -2.906398 | 0.157060  | -2.470318 | H                                                                                   | -2.393033 | -0.436874 | -2.231838 |
| H                                                                                  | -1.227411 | -0.365971 | -2.687541 | H                                                                                   | -0.845188 | -1.172736 | -1.762846 |
| C                                                                                  | -1.558973 | 0.717070  | -0.946649 | C                                                                                   | -1.833972 | -0.058062 | -0.196858 |
| O                                                                                  | -0.587689 | 0.514689  | -0.199399 | O                                                                                   | -0.815690 | -0.038618 | 0.593236  |
| O                                                                                  | -2.184815 | 1.848963  | -0.921020 | O                                                                                   | -2.403602 | 1.303726  | -0.495091 |
| C                                                                                  | -1.722321 | 2.908422  | -0.009476 | C                                                                                   | -1.704079 | 2.495297  | -0.011464 |
| H                                                                                  | -0.633337 | 2.893030  | -0.040929 | H                                                                                   | -0.642206 | 2.258161  | -0.082777 |
| C                                                                                  | -2.259425 | 4.193514  | -0.590361 | C                                                                                   | -2.056275 | 3.611475  | -0.967919 |
| H                                                                                  | -1.928796 | 5.029819  | 0.026884  | H                                                                                   | -1.510113 | 4.513044  | -0.685662 |
| H                                                                                  | -1.890759 | 4.346161  | -1.605048 | H                                                                                   | -1.785513 | 3.346331  | -1.990485 |

|   |           |           |           |   |           |           |           |
|---|-----------|-----------|-----------|---|-----------|-----------|-----------|
| H | -3.350857 | 4.182312  | -0.603358 | H | -3.125751 | 3.829863  | -0.928893 |
| C | -2.227424 | 2.616788  | 1.386266  | C | -2.094363 | 2.784810  | 1.421204  |
| H | -3.319062 | 2.598078  | 1.399640  | H | -3.165827 | 2.988991  | 1.489937  |
| H | -1.847790 | 1.666058  | 1.760455  | H | -1.846793 | 1.947671  | 2.074448  |
| H | -1.887186 | 3.408791  | 2.055561  | H | -1.553360 | 3.666080  | 1.769833  |
| O | -3.335197 | -0.578764 | 0.517835  | O | -3.103286 | -0.408283 | 0.527776  |
| H | -4.139038 | -0.434000 | 1.031609  | H | -3.303533 | 0.740492  | 0.143237  |
| H | -4.454712 | -1.291934 | -1.064117 | H | -4.532633 | -1.146445 | -0.771569 |
| C | 1.507470  | -1.716823 | 3.721168  | C | 3.238855  | 0.702057  | 3.399188  |
| H | 1.254900  | -2.616975 | 4.285756  | H | 3.570457  | 0.229986  | 4.326558  |
| H | 1.107308  | -0.849376 | 4.253387  | H | 2.783533  | 1.665873  | 3.643316  |
| H | 2.594984  | -1.625780 | 3.684395  | H | 4.114149  | 0.884761  | 2.772196  |
| C | 0.929844  | -1.773119 | 2.317104  | C | 2.236835  | -0.174212 | 2.666591  |
| H | 1.337032  | -2.659467 | 1.809836  | H | 2.712105  | -1.143787 | 2.458840  |
| C | -0.586620 | -1.895399 | 2.343820  | C | 0.996551  | -0.427108 | 3.512742  |
| H | -1.026625 | -1.017282 | 2.825052  | H | 0.479363  | 0.516779  | 3.706684  |
| H | -0.985082 | -1.965153 | 1.329552  | H | 0.303576  | -1.098453 | 2.998613  |
| H | -0.899620 | -2.787460 | 2.891945  | H | 1.260726  | -0.882737 | 4.469876  |
| O | 1.324794  | -0.609940 | 1.616190  | O | 1.890915  | 0.450664  | 1.446013  |
| C | 2.533474  | -1.495635 | -3.075634 | C | 1.589691  | -2.945759 | -2.119224 |
| H | 3.336420  | -2.027888 | -3.591042 | H | 2.307053  | -3.548863 | -2.681117 |
| H | 2.878541  | -0.482828 | -2.850775 | H | 1.473424  | -1.983471 | -2.626406 |
| H | 1.677109  | -1.427657 | -3.750042 | H | 0.626674  | -3.461191 | -2.129361 |
| C | 2.140053  | -2.209821 | -1.791046 | C | 2.059514  | -2.723674 | -0.688317 |
| H | 1.818425  | -3.226482 | -2.046581 | H | 2.171488  | -3.702924 | -0.206848 |
| C | 3.318198  | -2.310552 | -0.830149 | C | 3.411104  | -2.021021 | -0.658138 |
| H | 3.696161  | -1.312871 | -0.581445 | H | 3.357343  | -1.070031 | -1.199198 |
| H | 3.021571  | -2.811052 | 0.094503  | H | 3.718264  | -1.819026 | 0.370828  |
| H | 4.137956  | -2.876620 | -1.277922 | H | 4.182205  | -2.631799 | -1.132857 |
| O | 1.034427  | -1.557932 | -1.190227 | O | 1.083493  | -2.002305 | 0.036965  |
| C | 4.069725  | 2.494847  | -0.386121 | C | 2.560303  | 1.369215  | -3.092708 |
| H | 4.713516  | 3.071024  | 0.282187  | H | 3.400104  | 2.011493  | -3.366954 |
| H | 3.660636  | 3.172580  | -1.140635 | H | 1.696937  | 1.644966  | -3.705071 |
| H | 4.680667  | 1.744892  | -0.893056 | H | 2.826744  | 0.335371  | -3.324169 |
| C | 2.941185  | 1.827593  | 0.381539  | C | 2.217087  | 1.511192  | -1.618750 |

|                                                                                   |           |           |           |    |          |           |           |
|-----------------------------------------------------------------------------------|-----------|-----------|-----------|----|----------|-----------|-----------|
| H                                                                                 | 3.381275  | 1.157764  | 1.132723  | H  | 3.102118 | 1.231255  | -1.029999 |
| C                                                                                 | 2.076910  | 2.850101  | 1.106764  | C  | 1.855986 | 2.947128  | -1.266355 |
| H                                                                                 | 1.653316  | 3.559862  | 0.390449  | H  | 0.972551 | 3.260962  | -1.830137 |
| H                                                                                 | 1.255912  | 2.355077  | 1.633598  | H  | 1.637563 | 3.037037  | -0.199535 |
| H                                                                                 | 2.662321  | 3.409426  | 1.840585  | H  | 2.678025 | 3.626288  | -1.505009 |
| O                                                                                 | 2.158886  | 1.069978  | -0.523897 | O  | 1.141393 | 0.645506  | -1.309693 |
| Al                                                                                | 1.100356  | -0.234727 | -0.065273 | Al | 0.940140 | -0.264192 | 0.169835  |
| P5''                                                                              |           |           |           |    |          |           |           |
| 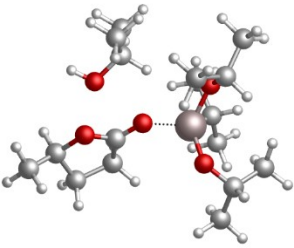 |           |           |           |    |          |           |           |
| C                                                                                 | -4.902935 | -1.941405 | 1.328477  |    |          |           |           |
| H                                                                                 | -4.382123 | -2.711682 | 1.899765  |    |          |           |           |
| H                                                                                 | -5.724558 | -2.408775 | 0.783043  |    |          |           |           |
| H                                                                                 | -5.318897 | -1.202885 | 2.014068  |    |          |           |           |
| C                                                                                 | -3.967797 | -1.300986 | 0.340901  |    |          |           |           |
| C                                                                                 | -3.263114 | -2.248249 | -0.627257 |    |          |           |           |
| H                                                                                 | -3.825473 | -2.362139 | -1.550866 |    |          |           |           |
| H                                                                                 | -3.142764 | -3.226303 | -0.159050 |    |          |           |           |
| C                                                                                 | -1.901064 | -1.587556 | -0.832698 |    |          |           |           |
| H                                                                                 | -1.878213 | -0.892361 | -1.674614 |    |          |           |           |
| H                                                                                 | -1.064008 | -2.277778 | -0.934316 |    |          |           |           |
| C                                                                                 | -1.754124 | -0.771489 | 0.410608  |    |          |           |           |
| O                                                                                 | -0.731631 | -0.229966 | 0.850634  |    |          |           |           |
| O                                                                                 | -2.588744 | 1.503633  | -0.942717 |    |          |           |           |
| C                                                                                 | -1.573867 | 2.470587  | -0.635519 |    |          |           |           |
| H                                                                                 | -0.635842 | 1.921233  | -0.737491 |    |          |           |           |
| C                                                                                 | -1.602032 | 3.608844  | -1.639520 |    |          |           |           |
| H                                                                                 | -0.782386 | 4.306046  | -1.454104 |    |          |           |           |
| H                                                                                 | -1.509767 | 3.228768  | -2.658262 |    |          |           |           |
| H                                                                                 | -2.543966 | 4.159432  | -1.558147 |    |          |           |           |
| C                                                                                 | -1.717808 | 2.963643  | 0.792501  |    |          |           |           |
| H                                                                                 | -2.652447 | 3.521825  | 0.905849  |    |          |           |           |

|   |           |           |           |
|---|-----------|-----------|-----------|
| H | -1.724233 | 2.125772  | 1.490894  |
| H | -0.890540 | 3.627434  | 1.052319  |
| O | -2.855808 | -0.682356 | 1.088037  |
| H | -3.449713 | 1.916650  | -0.792453 |
| H | -4.445125 | -0.475716 | -0.188959 |
| C | 2.967277  | 2.747977  | 2.207228  |
| H | 3.438203  | 2.915450  | 3.178278  |
| H | 2.210483  | 3.521711  | 2.049857  |
| H | 3.729436  | 2.849891  | 1.432150  |
| C | 2.323955  | 1.373715  | 2.144718  |
| H | 3.103149  | 0.617163  | 2.314304  |
| C | 1.259377  | 1.208642  | 3.220327  |
| H | 0.460326  | 1.940660  | 3.073484  |
| H | 0.822507  | 0.207157  | 3.184235  |
| H | 1.686111  | 1.353457  | 4.215555  |
| O | 1.768996  | 1.189400  | 0.853864  |
| C | 2.138852  | -3.734806 | -0.163230 |
| H | 2.946476  | -4.441274 | -0.368922 |
| H | 1.775360  | -3.338679 | -1.116328 |
| H | 1.322332  | -4.275734 | 0.319668  |
| C | 2.617732  | -2.595637 | 0.724484  |
| H | 2.991148  | -3.021072 | 1.663738  |
| C | 3.754732  | -1.826373 | 0.064078  |
| H | 3.445368  | -1.462022 | -0.921063 |
| H | 4.054399  | -0.972253 | 0.677128  |
| H | 4.628440  | -2.466107 | -0.078391 |
| O | 1.531694  | -1.747728 | 1.046301  |
| C | 2.019607  | -0.608154 | -3.557362 |
| H | 2.731514  | -0.198280 | -4.277271 |
| H | 1.065692  | -0.772018 | -4.066613 |
| H | 2.394665  | -1.574328 | -3.212283 |
| C | 1.820388  | 0.335446  | -2.382700 |
| H | 2.793661  | 0.498886  | -1.899054 |
| C | 1.289552  | 1.686374  | -2.836373 |
| H | 0.295558  | 1.566103  | -3.276597 |



|    |          |           |           |  |
|----|----------|-----------|-----------|--|
| H  | 1.216749 | 2.375275  | -1.992149 |  |
| H  | 1.950052 | 2.131403  | -3.584393 |  |
| O  | 0.919549 | -0.261618 | -1.466517 |  |
| Al | 1.038738 | -0.273789 | 0.266015  |  |
